# Initial assessment of the spatial learning, reversal, and sequencing task capabilities of knock-in rats with humanizing mutations in the A $\beta$ -coding region of *App*

Hoa Pham<sup>¶</sup>, Tao Yin<sup>¶</sup> and Luciano D'Adamio\*

Department of Pharmacology, Physiology & Neuroscience New Jersey Medical School, Brain Health Institute, Jacqueline Krieger Klein Center in Alzheimer's Disease and Neurodegeneration Research, Rutgers, The State University of New Jersey, 185 South Orange Ave, Newark, NJ, 07103, USA.

Corresponding author

E-mail: [luciano.dadamio@rutgers.edu](mailto:luciano.dadamio@rutgers.edu)

<sup>¶</sup>These authors contributed equally to this work.

## Abstract

Model organisms mimicking the pathogenesis of human diseases are useful for identifying pathogenic mechanisms and testing therapeutic efficacy of compounds targeting them. Models of Alzheimer's disease and related dementias aim to reproduce the brain pathology associated with these neurodegenerative disorders. Transgenic models, which involve random insertion of disease-causing genes under the control of artificial promoters, are efficient means of doing so. There are confounding factors associated with transgenic approaches, however, including target gene overexpression, dysregulation of endogenous gene expression at transgenes' integration sites, and limitations in mimicking loss-of-function mechanisms. Furthermore, the choice of species is important, and there are anatomical, physiological, and cognitive reasons for favoring the rat over the mouse, which has been the standard for models of neurodegeneration and dementia. We report an initial assessment of the spatial learning, reversal, and sequencing task capabilities of knock-in Long-Evans rats with humanizing mutations in the A $\beta$ -coding region of *App*, which encodes amyloid precursor protein (*App*<sup>h/h</sup> rats), using the IntelliCage, an automated operant social home cage system, at 6-8 weeks of age, then again at 4-5 months of age. These rats were previously generated as control organisms for studies on neurodegeneration involving other knock-in rat models from our lab. *App*<sup>h/h</sup> rats of either sex can acquire place learning and reversal tasks. They can also acquire a diagonal sequencing task by 6-8 weeks of age, but not a more advanced serial reversal task involving alternating diagonals, even by 4-5 months of age.

## Introduction

Technical innovation has enabled researchers in the past two decades to study neurodegenerative disorders with greater precision. For example, optogenetics, a technique for modulating individual neuron activity through activation of light-sensitive proteins called opsins(1), has been used to evaluate grafts of mesencephalic dopaminergic neurons derived from human embryonic stem cells in a mouse model of Parkinson's disease(2); while electron cryo-microscopy, whose resolution has become comparable to that of X-ray crystallography(3) has revealed the structure of

histopathological tau filaments in patients with frontotemporal dementia(4). Single-cell resolution transcriptomics has been used to characterize the cell diversity of the entire mouse central nervous system (CNS)(5), yielding reference data for exploring the molecular mechanisms of Alzheimer's disease (AD), the most common form of dementia among the elderly, and related dementias in the context of animal models, which have diversified following improvements in genome-editing technologies(6). In parallel with model diversification arose high-throughput, automated methods for behavioral phenotyping(7): alongside traditional paradigms such as novel object recognition, the Morris swim task (also known as the Morris water maze), the T-maze, and the Y-maze, are operant touchscreens(8) and systems like the IntelliCage (NewBehavior AG)(9, 10), which has been used to identify cognitive deficits in multiple mouse models of AD in a socially housed setting(11).

Despite these advances and decades of research overall, the pathogenic mechanisms of AD remain poorly understood and no viable treatments have been developed(12), suggesting a fundamental flaw in the investigative approach, the underlying pathogenic assumption, or both. In this case, there is evidence implicating both: most AD research has focused on the role of amyloid- $\beta$  peptide (A $\beta$ ) accumulation, either as insoluble aggregates or soluble dimers/oligomers as the causative agent of a series of events involving neuronal death, oxidative stress, synaptic loss, and neuroinflammation leading to AD, which defines the "amyloid cascade hypothesis"(13, 14). This, encouraged by links between autosomal dominant mutations in genes causing AD and changes in proteolytic processing of APP, or amyloid precursor protein(15), has prompted researchers to generate animal models of overexpression, mostly transgenic mice, as an efficient way of reproducing these alleged pathogenic conditions(16). However, individuals can have significant amyloid plaque burden without corresponding memory impairment(17-22), and many models do not exhibit the widespread neurodegeneration, cortical atrophy, or neurofibrillary tau tangles present in AD(13, 16). Moreover, the transgenic approach is non-physiological and etiologically biased, which is not ideal for simulating the human disease state.

The species also matters in evaluating the animal model paradigm. Compared to mice, rats have larger brains, which allows for more accurate direction of cannulas (for administration of drugs,

biologics, viruses, etc.) and micro-dialysis probes (for sampling extracellular brain levels of neurotransmitters, A $\beta$ , soluble tau, etc.) to individual brain regions, causing less damage and increasing specificity. In vivo brain imaging techniques, such as MRI(23) and PET(24-26), can assess the extent and course of neurodegeneration with better spatial resolution in rats. Moreover, rats are large enough for convenient in vivo electrophysiological recordings or serial sampling of cerebrospinal fluid for detection of biomarkers. Rats also express in the brain during adulthood due to alternative splicing, like humans(27), both three- (3R) and four-repeat (4R) microtubule-binding domain isoforms of tau(28-31), a protein that forms neurofibrillary tangles in AD and is mutated in frontotemporal dementia(32-39), unlike adult mice, which only express 4R isoforms(40). Finally, rats have been a choice species for behavioral, memory, and cognitive research due to their physiological similarity with humans and intelligence(41-44), which are critical when studying neurodegenerative diseases. These observations, along with the failure to translate results from current models into viable therapies(12), suggest that knock-in rat models may be better suited for the study of mechanisms underlying neurodegeneration and dementia than transgenic mouse models.

We report an assessment of the spatial learning, reversal, and sequencing task performance of knock-in Long-Evans rats carrying humanizing mutations in the A $\beta$ -coding region of *App* (*App*<sup>h/h</sup> rats) at 6-8 weeks of age, and again at 4-5 months of age, with the IntelliCage. As human and rat A $\beta$  differ by three amino acids and A $\beta$  aggregates are widely regarded as the main pathogenic molecules in AD with human A $\beta$  being possibly more likely to form toxic A $\beta$  species than rodent A $\beta$ , (45) these animals are controls for knock-in rat models designed and generated by L. D'Adamio for neurodegeneration research, which have already yielded insights on biochemical effects of pathogenic(46) and protective(47) mutations in *APP*(48, 49), the pathogenic *PSEN1* L435F mutation(50), the Familial Danish ITM2b mutation(51), and of the R47H variant in *TREM2*(52-54), which is associated with increased AD risk (55, 56). Full characterization of these models requires cognitive and behavioral evaluation: this study establishes in part a baseline profile for the control rats while exploring analytic ideas specific to the IntelliCage paradigm that may inform further work, specifically activity curves representing aggregate behavior of experimental subjects and use of the

area under those curves as a measure for statistical comparison. Moreover, the body of IntelliCage research is small: a PubMed query in December 2021 for “IntelliCage” yielded only 128 results dating from 2005, with the majority referring to mouse experiments. Therefore, this study is not only an initial cognitive characterization, but also a contribution to the nascent body of rat IntelliCage literature and a reference for analytical methods.

## **Material and Methods**

### *Animals and Experimental Design*

All experiments were done according to policies on the care and use of laboratory animals of the Ethical Guidelines for Treatment of Laboratory Animals of the NIH. Relevant protocols were approved by the Rutgers Institutional Animal Care and Use Committee (IACUC) (Protocol #201702513). All efforts were made to minimize animal suffering and reduce the number of rats used. Prior to and after behavioral analysis, males were housed 2 per cage and females were housed 3 per cage under controlled laboratory conditions with a 12-hr dark/light cycle, at a temperature of  $25 \pm 1^\circ\text{C}$ . They were anesthetized with isoflurane, tagged subcutaneously with radio frequency identification transponders, and allowed to recover for at least a week. Rats had free access to standard rodent diet and tap water while in traditional housing and were monitored for dehydration during periods of water restriction during behavioral analysis. Long-Evans rats expressing humanized *App* alleles (*App*<sup>h/h</sup>) were generated as described previously.(48)

### *IntelliCage*

115 The IntelliCage for Rats (NewBehavior AG) was used to collect behavioral data. It consists of a  
 116 central square home cage connected to four operant learning chambers, or *corners*. Every corner has  
 117 two sides, each with a drinking bottle gated by a rotating door with a nosepoke sensor (Figure 1). The  
 118 sides also include LEDs and air puff delivery valves as additional conditioning components.  
 119 Behavioral programs are defined by the user within a visual coding platform. Subcutaneously injected  
 120 transponders allow the IntelliCage to track the behavior of individual animals with unique radio  
 121 frequency identification tags. Among the parameters tabulated for subsequent analysis are corner

| Day | Cohort A              | Cohort B                          |
|-----|-----------------------|-----------------------------------|
| 1   | Free adaptation       | Free adaptation                   |
| 2   | Nosepoke adaptation   | Nosepoke adaptation               |
| 3   | Time adaptation       | Time adaptation                   |
| 4   |                       | Single corner restriction         |
| 5   |                       |                                   |
| 6   |                       |                                   |
| 7   | Place learning        | Place learning with corner switch |
| 8   |                       |                                   |
| 9   |                       |                                   |
| 10  | Place reversal        |                                   |
| 11  | Behavioral sequencing | Behavioral sequencing             |
| 12  |                       |                                   |
| 13  |                       |                                   |
| 14  |                       |                                   |
| 15  |                       |                                   |
| 16  | Serial reversal       | Serial reversal                   |
| 17  |                       |                                   |
| 18  |                       |                                   |
| 19  |                       |                                   |

**Table 1.** IntelliCage program timeline overview for cohorts A and B.

122 visits, visit lengths, visit times, number of nosepokes per visit, and number of bottle licks per visit. This  
 123 system offers a variety of advantages over human observation: high-throughput, unbiased data  
 124 collection and reporting; minimal risk of human error; minimal perturbation of testing conditions; and  
 125 uniform testing of multiple animals simultaneously in a social setting. Two cohorts of *App<sup>h/h</sup>* rats were  
 126 studied, A and B, housed across four IntelliCages, separated by sex and cohort. They were run on  
 127 separate program timelines, once at 6-8 weeks of age and again at 4-5 months of age (the *first pass*

128 and *second pass* through the program timeline, respectively), as outlined in Table 1 with program  
129 descriptions in Figure 2.

130 **Figure 1. IntelliCage schematic.** Central home cage and four labeled corners with two drinking sides per  
131 corner.

132 **Figure 2. Descriptions of IntelliCage programs.** (a) Single corner restriction (Cohort B only, 2 days).  
133 Progression of drinking (green) and non-drinking (yellow) corner layouts over two days. (b) Place learning  
134 (Cohort A only, 3 days). Example of correct (green) and incorrect (yellow) corner layout for a rat assigned to  
135 corner 4. (c) Place learning with corner switch (Cohort B only, 4 days). On the top left is the cycle of correct  
136 corners with movement every 45 minutes. The rest of the panel, starting from the bottom left, depicts an  
137 example of correct (green) and incorrect (yellow, or red highlighting the previously correct corner) layouts for a  
138 rat initially assigned to corner 1 and their cycle over the four phases of a drinking session, which ends with the  
139 top right layout before returning to the top center layout during the start of the next drinking session. (d) Place  
140 reversal (Cohort A only, 3 days). Example of correct (green) and incorrect (yellow, or red highlighting the  
141 previously correct corner) corner layout for a rat assigned to corner 4 during place learning. (e) Behavioral  
142 sequencing (Cohort A: 3 days, Cohort B: 5 days). Example of correct (green), lateral (yellow), and opposite (red)  
143 corner layouts and pattern for a rat initially assigned to either corner 2 or 4. (f) Serial reversal (both cohorts, 4  
144 days). Schematic of correct (green), lateral (yellow), and opposite (red) corner layouts and pattern. The starting  
145 layout depends on the initial corner assignment.

## 146 *IntelliCage programs*

147 Free adaptation (both cohorts, 1 day) - The rats may drink water ad libitum and explore the  
148 IntelliCage, familiarizing themselves with its layout; all bottle access doors open in response to any  
149 corner visit.

150 Nosepoke adaptation (both cohorts, 1 day) - The rats learn they must activate a nosepoke sensor to  
151 open a water access door at any corner for seven seconds; this nosepoke mechanic remains active  
152 for every program hereafter.

153 Time adaptation (Cohort A: 4 days, Cohort B: 2 days) - The rats may only drink between 8pm and  
154 11pm at any corner, a time window called the *drinking session*.

155 Single corner restriction (Cohort B only, 2 days) - All rats must drink from a single correct corner with  
 156 the other corners being neutral during the drinking session. The correct corner changes after ninety  
 157 minutes, such that the rats can drink at one corner during the first half of the drinking session and  
 158 must switch to the opposite corner during the second half. Over two days, the correct corner  
 159 designation follows the path 1->3 (1st day), then 2->4 (2nd day), covering all corners (Figure 2A).  
 160 Place learning (Cohort A only, 3 days) - The rats may only drink during the drinking session at a  
 161 corner assigned to each of them; these assigned corners are considered correct, and the non-  
 162 assigned corners are considered incorrect (Figure 2B).  
 163 Place learning with corner switch (Cohort B only, 4 days) - Each rat is assigned an initial correct  
 164 corner where it can drink during the drinking session, as in place learning, with the other corners  
 165 being incorrect. Every 45 minutes, the correct corner designations are switched according to the cycle  
 166 (1->3->4->2[->1]). [Figure] illustrates this for a rat with corner 1 as the initially assigned correct corner.  
 167 If corner 2 were the initial correct corner, the cycle would be shifted over once (2->1->3->4[->2]). After  
 168 the first switch, the positions of the incorrect corners adjust accordingly. By the first 45-minute block of  
 169 the next drinking session, the correct corner will have returned to its initial location. A *phase* refers to  
 170 a 45-minute block during the drinking session in this program. The end of a phase marks when a  
 171 corner switch occurs (Figure 2C).  
 172 Place reversal (Cohort A only, 3 days) - The rats may only drink during the drinking session at the  
 173 corner diagonally opposite the one assigned in place learning; those reversed corners are considered  
 174 correct, and the remaining corners, including the original assigned corner, are considered incorrect  
 175 (Figure 2D).  
 176 Behavioral sequencing (Cohort A: 3 days, Cohort B: 5 days) - The rats must alternate between  
 177 drinking at the initial learned corner and the opposite corner during the drinking session, so that one  
 178 corner in the assigned diagonal is active (correct) at a time while the other is inactive (opposite); the  
 179 conditions of the corners in the assigned diagonals alternate between correct and opposite, with a  
 180 correct nosepoke triggering a condition switch. Visits to corners in the non-assigned diagonal are  
 181 considered *lateral* visits (Figure 2E).

182 Serial reversal (both cohorts, 4 days) - The rats must alternate between a behavioral sequencing  
183 pattern on the original diagonal and the same on the other diagonal during the drinking session; the  
184 diagonal switches after every eight successive correct nose pokes. The corner conditions change as in  
185 the behavioral sequencing program, only now one must consider which diagonal is active in  
186 determining the corner conditions at any time (Figure 2F).

### 187 *Corner rank comparison*

188 We followed this workflow to compare animal activity during the single corner restriction program:

189 1. For each 90-minute block of the program during the drinking session, rank the animals according to  
190 the number of visits made to the appropriate correct corner; there should be four lists for each  
191 IntelliCage, corresponding to the 8:00-9:30pm and 9:30-11:00pm periods of drinking sessions 1 and  
192 2.

193 2. An animal is said to *out-visit* another animal at a corner if it makes more visits than the other one  
194 during a given time interval. Assign four scores to each animal equal to the number of animals it out-  
195 visits, one score for each 90-minute block; each corner should be represented once as a correct  
196 corner.

197 3. Use the scores to generate mean scores and standard errors for statistical analysis.

### 198 *Activity curves*

199 We followed this workflow to produce the activity curves for each program:

200 1. Categorize each rat's visits by their contextual value in the program, i.e., correct, incorrect, lateral,  
201 or opposite.

202 2. For each subset of rats by sex, cohort, and pass (e.g., cohort A males in their first pass), count the  
203 total number of visits those rats made for each drinking session. For a 3-day program, there should be  
204 3 totals for a given subset.

3. For each subset as described in step 3, tabulate the fractional accumulation of visits by category over time for each drinking session, adding to each fraction, starting from 0, the value of 1 divided by the associated total count for that subset and drinking session each time a visit belonging to a certain category occurs, and 0 otherwise. For each drinking session of a given subset, the final fractions should sum to 1.

4. Match each fraction with a timestamp relative to the start of the first drinking session of a program, excluding time not belonging to a drinking session, e.g., if the  $n$ th fraction is associated with a visit that occurred during the 35<sup>th</sup> minute of the third drinking session of a program, the fraction is matched with minute 395 ( $180 + 180 + 35$ ).

5. Plot the resulting tables with time as the independent variable and fraction as the dependent variable, yielding the activity curves.

### *Statistical analysis*

We followed this workflow for statistical analysis of activity for each program:

1. Tabulate the fractional accumulation for individual rats as described above; in other words, make the calculations necessary to generate activity curves for each rat in the IntelliCage rather than a group of them for every drinking session.

2. Calculate the area underneath each activity curve, bounded on the left and right by the start and end of each drinking session, respectively, and below by the x-axis. Before calculating the area, we completed the curve by extending it horizontally such that the final fraction at the end of the drinking session is equal to the fraction accumulated by the last visit the animal made during that drinking session. Each result is a data point representing the cumulative activity of a specific rat for a given drinking session and visit category.

3. Run statistical tests with those data points based on desired comparisons.

## Results

### ***App<sup>h/h</sup>* rats do not visit corners more often than other *App<sup>h/h</sup>* rats during single corner restriction in cohort B at either 6-8 weeks or 4-5 months of age.**

After IntelliCage adaptation as outlined in Table 1, rats in cohort B were started on the single corner restriction program, which tested whether the animals were able to share this corner equally among themselves for water. The animals were assigned a rank during each 90-minute block of the two drinking sessions (four ranks total) based on visits to the actively correct corner, as described in the methods. The mean rank was used to compare animal activity (Figure 3). There were no significant differences among male rats during either pass. During the first pass one female rat (Animal 22) had a mean rank significantly lower than that of two other female rats (Animals 16 and 17), but this difference was not observed during the second pass.

**Figure 3 – Single corner restriction, cohort B.** Average scores for individual animals in cohort B by sex and pass, in decreasing order from left to right. Data points from the first and second passes are indicated by white and red circles, respectively. All data represented as mean  $\pm$  SEM ( $*p < 0.05$ ). See Table 2 for statistical analysis. FP = first pass (6-8 weeks), SP = second pass (4-5 months). ♀ = female, ♂ = male.

| Ordinary one-way ANOVA, single corner restriction, cohort B |                                                         |                     |            |
|-------------------------------------------------------------|---------------------------------------------------------|---------------------|------------|
| Female                                                      | Pass                                                    | F (DFn, DFd)        | P          |
|                                                             | First (6-8 weeks)                                       | F (9, 30) = 3.306   | 0.0065     |
|                                                             | Second (4-5 months)                                     | F (9, 30) = 0.9019  | 0.5359     |
|                                                             | post-hoc Sidak's multiple comp. test                    | Summary             | Adjusted P |
|                                                             | 16 (1 <sup>st</sup> pass) vs. 22 (1 <sup>st</sup> pass) | *                   | 0.0278     |
|                                                             | 17 (1 <sup>st</sup> pass) vs. 22 (1 <sup>st</sup> pass) | *                   | 0.0278     |
| Male                                                        | Pass                                                    | F (DFn, DFd)        | P          |
|                                                             | First (6-8 weeks)                                       | F (10, 33) = 0.8408 | 0.5941     |
|                                                             | Second (4-5 months)                                     | F (10, 33) = 0.9633 | 0.4921     |

**Table 2 –** Statistical analysis of data shown in Figure 3 for single corner restriction, cohort B. A  $p$ -value less than 0.05 is considered significant ( $*p < 0.05$ ).

### ***App<sup>h/h</sup>* rats in cohort A can acquire a place learning task by 6-8 weeks of age with session-wise improvement.**

242 After IntelliCage adaptation as outlined in Table 1, rats in cohort A were started on the place learning  
 243 program. Animal activity in this program and subsequent programs was summarized via (1) activity  
 244 curves showing the fractional accumulation of corner visits by category of all animals during each  
 245 drinking session, organized by sex and pass; and (2) comparisons of mean area under the activity  
 246 curves of individual animals by visit category during each drinking session, to quantify differences in  
 247 task performance. Qualitatively, an activity curve for correct visits that steepens as the one for  
 248 incorrect visits flattens, session-wise, signifies task acquisition (Figure 4A). Analysis of area under the  
 249 curves (AUC) revealed significant session-wise increases for correct visits (C-AUC) with  
 250 accompanying decreases for incorrect visits (IC-AUC) for both sexes during the first pass (Figure 4B).  
 251 During the second pass, there were no significant session-wise differences in C-AUC for either sex,  
 252 and IC-AUC was significantly lower for the 3<sup>rd</sup> drinking session compared to the 1<sup>st</sup> and 2<sup>nd</sup> for females  
 253 alone (Figure 4B). For the 2<sup>nd</sup> drinking session of the first pass, IC-AUC was significantly lower for  
 254 males (Figure 4B). For females, C-AUC was significantly higher for each drinking session of the  
 255 second pass compared to the first, whereas IC-AUC was significantly lower for the 1<sup>st</sup> drinking session  
 256 during the second pass; there were no significant differences between passes for males (Figure 4C).

**Figure 4 – Place learning, cohort A. (A)** Activity curves showing the fractional accumulation (y-axis) of visits over drinking session time (x-axis), reset every 180 minutes, by sex and pass. Curves for correct and incorrect visits are black and blue, respectively. **(B)** Sex comparison of area under the curve (AUC) for activity curves of individual animals by visit category and pass. “\*” denotes significant comparisons within sex across program days, while “#” denotes those for the corresponding program day between sexes. Female (♀) and male (♂) data points are indicated by white and black circles, respectively. **(C)** Pass comparison of AUCs for activity curves of individual animals by sex, program day, and visit category. Data points from the first and second passes are indicated by white and red circles, respectively. All data represented as mean ± SEM (\* $p < 0.05$ , \*\* $p < 0.01$ , \*\*\* $p < 0.001$ , \*\*\*\* $p < 0.0001$ , similarly for # $p < 0.05$ , etc.). See Tables 3-5 for statistical analysis. FP = first pass (6-8 weeks), SP = second pass (4-5 months), C = correct (visits), IC = incorrect (visits).

| Figure 4B          | Mixed-effects analysis, place learning, cohort A, first pass |                   |          |
|--------------------|--------------------------------------------------------------|-------------------|----------|
| Correct (C-AUC)    | Source of Variation                                          | F (DFn, DFd)      | P        |
|                    | Interaction                                                  | F (2, 43) = 4.389 | 0.0184   |
|                    | Day                                                          | F (2, 43) = 24.08 | <0.0001  |
|                    | Sex                                                          | F (1, 22) = 3.847 | 0.0626   |
|                    | post-hoc Sidak's multiple comp. test                         | Summary           | Adjus. P |
|                    | Female, day 1 vs. day 2                                      | ns                | 0.9995   |
|                    | Female, day 1 vs. day 3                                      | ***               | 0.0010   |
|                    | Female, day 2 vs. day 3                                      | **                | 0.0013   |
|                    | Male, day 1 vs. day 2                                        | ***               | 0.0003   |
|                    | Male, day 1 vs. day 3                                        | ****              | <0.0001  |
| Incorrect (IC-AUC) | Male, day 2 vs. day 3                                        | ns                | 0.2879   |
|                    | Source of Variation                                          | F (DFn, DFd)      | P        |
|                    | Interaction                                                  | F (2, 43) = 3.207 | 0.0503   |
|                    | Day                                                          | F (2, 43) = 17.84 | <0.0001  |
|                    | Sex                                                          | F (1, 22) = 4.410 | 0.0474   |
|                    | post-hoc Sidak's multiple comp. test                         | Summary           | Adjus. P |
|                    | Female, day 1 vs. day 2                                      | ns                | 0.8453   |
|                    | Female, day 1 vs. day 3                                      | ****              | <0.0001  |
|                    | Female, day 2 vs. day 3                                      | ***               | 0.0006   |
|                    | Male, day 1 vs. day 2                                        | *                 | 0.0136   |
|                    | Male, day 1 vs. day 3                                        | **                | 0.0023   |
|                    | Male, day 2 vs. day 3                                        | ns                | 0.9004   |
|                    | Female vs. Male, day 1                                       | ns                | 0.2537   |
|                    | Female vs. Male, day 2                                       | #                 | 0.0130   |
|                    | Female vs. Male, day 3                                       | ns                | 0.7167   |

**Table 3** – Statistical analysis of data shown in Figure 4B for place learning, cohort A, first pass (6-8 weeks). A *p*-value less than 0.05 is considered significant (\**p* < 0.05, \*\**p* < 0.01, \*\*\**p* < 0.001, \*\*\*\**p* < 0.0001). ns = not significant.

| Figure 4B          | Mixed-effects analysis, place learning, cohort A, second pass |                    |          |
|--------------------|---------------------------------------------------------------|--------------------|----------|
| Correct (C-AUC)    | Source of Variation                                           | F (DFn, DFd)       | P        |
|                    | Interaction                                                   | F (2, 35) = 4.975  | 0.0125   |
|                    | Day                                                           | F (2, 35) = 2.064  | 0.1422   |
|                    | Sex                                                           | F (1, 20) = 0.2437 | 0.6269   |
| Incorrect (IC-AUC) | Source of Variation                                           | F (DFn, DFd)       | P        |
|                    | Interaction                                                   | F (2, 35) = 5.580  | 0.0079   |
|                    | Day                                                           | F (2, 35) = 6.305  | 0.0046   |
|                    | Sex                                                           | F (1, 20) = 0.1981 | 0.6610   |
|                    | post-hoc Sidak's multiple comp. test                          | Summary            | Adjus. P |
|                    | Female, day 1 vs. day 2                                       | ns                 | 0.3829   |
|                    | Female, day 1 vs. day 3                                       | *                  | 0.0470   |
|                    | Female, day 2 vs. day 3                                       | ***                | 0.0009   |
|                    | Male, day 1 vs. day 2                                         | ns                 | 0.0632   |
|                    | Male, day 1 vs. day 3                                         | ns                 | 0.1004   |
|                    | Male, day 2 vs. day 3                                         | ns                 | 0.9945   |

**Table 4** – Statistical analysis of data shown in Figure 4B for place learning, cohort A, second pass (4-5 months). A *p*-value less than 0.05 is considered significant (\**p* < 0.05, \*\*\**p* < 0.001). ns = not significant.

| Figure 4C          | Paired <i>t</i> tests, place learning, cohort A, pass comparison |                                  |         |          |
|--------------------|------------------------------------------------------------------|----------------------------------|---------|----------|
|                    | Comparison                                                       | <i>t</i> , <i>df</i>             | Summary | <i>P</i> |
| Correct (C-AUC)    | Female, day 1                                                    | <i>t</i> =5.672, <i>df</i> =9    | ***     | 0.0003   |
|                    | Male, day 1                                                      | <i>t</i> =1.141, <i>df</i> =9    | ns      | 0.2834   |
|                    | Female, day 2                                                    | <i>t</i> =4.655, <i>df</i> =9    | **      | 0.0012   |
|                    | Male, day 2                                                      | <i>t</i> =0.9056, <i>df</i> =9   | ns      | 0.3888   |
|                    | Female, day 3                                                    | <i>t</i> =5.332, <i>df</i> =9    | ***     | 0.0005   |
|                    | Male, day 3                                                      | <i>t</i> =0.01567, <i>df</i> =10 | ns      | 0.9878   |
| Incorrect (IC-AUC) | Female, day 1                                                    | <i>t</i> =3.283, <i>df</i> =9    | **      | 0.0095   |
|                    | Male, day 1                                                      | <i>t</i> =1.055, <i>df</i> =9    | ns      | 0.3189   |
|                    | Female, day 2                                                    | <i>t</i> =0.5384, <i>df</i> =9   | ns      | 0.6034   |
|                    | Male, day 2                                                      | <i>t</i> =0.4251, <i>df</i> =9   | ns      | 0.6807   |
|                    | Female, day 3                                                    | <i>t</i> =0.7488, <i>df</i> =9   | ns      | 0.4731   |
|                    | Male, day 3                                                      | <i>t</i> =0.3990, <i>df</i> =10  | ns      | 0.6983   |

**Table 5** – Statistical analysis of data shown in Figure 4C for place learning, cohort A, pass comparison. A *p*-value less than 0.05 is considered significant (\*\**p* < 0.01, \*\*\**p* < 0.001). ns = not significant.

258 ***App<sup>h/h</sup>* rats in cohort A can acquire a place reversal task by 6-8 weeks of age with session-wise**  
259 **improvement.** After place learning, rats in cohort A were started on the place reversal program,  
260 which switches the correct corner in place learning to the one diagonally opposing it. Activity curves  
261 showed qualitative improvement, like those shown for place learning (Figures 4A and 5A). There were  
262 also significant session-wise increases in C-AUC and decreases in IC-AUC for both sexes during the  
263 first pass, with no significant differences seen during the second pass for either sex (Figure 5B).  
264 There were significant sex differences seen during the first pass, with C-AUC higher and IC-AUC  
265 lower for males for every drinking session, but not during the second pass (Figure 5B). For females,  
266 C-AUC was significantly higher during the second pass compared to the first for the 1<sup>st</sup> and 3<sup>rd</sup>  
267 drinking sessions, with the value for the 2<sup>nd</sup> drinking session being higher but not reaching  
268 significance, while IC-AUC was not significantly different for any drinking session; there were no

269 significant differences between passes for males (Figure 5C).

**Figure 5 – Place reversal, cohort A. (A)** Activity curves showing the fractional accumulation (y-axis) of visits over drinking session time (x-axis), reset every 180 minutes, by sex and pass. Curves for correct and incorrect visits are black and blue, respectively. **(B)** Sex comparison of area under the curve (AUC) for activity curves of individual animals by visit category and pass. “\*” denotes significant comparisons within sex across program days, while “#” denotes those for the corresponding program day between sexes. Female (♀) and male (♂) data points are indicated by white and black circles, respectively. **(C)** Pass comparison of AUCs for activity curves of individual animals by sex, program day, and visit category. Data points from the first and second passes are indicated by white and red circles, respectively. All data represented as mean ± SEM (\* $p < 0.05$ , \*\* $p < 0.01$ , \*\*\* $p < 0.001$ , \*\*\*\* $p < 0.0001$ , similarly for # $p < 0.05$ , etc.). See Tables 6-8 for statistical analysis. FP = first pass (6-8 weeks), SP = second pass (4-5 months), C = correct (visits), IC = incorrect (visits).

270

| <b>Figure 5B</b>                                              |                                      |                     |            |
|---------------------------------------------------------------|--------------------------------------|---------------------|------------|
| <b>Two-way RM ANOVA, place reversal, cohort A, first pass</b> |                                      |                     |            |
| Correct<br>(C-AUC)                                            | Source of Variation                  | F (DFn, DFd)        | P          |
|                                                               | Interaction                          | F (2, 44) = 0.08855 | 0.9154     |
|                                                               | Day                                  | F (2, 44) = 12.26   | <0.0001    |
|                                                               | Sex                                  | F (1, 22) = 15.38   | 0.0007     |
|                                                               | post-hoc Sidak's multiple comp. test | Summary             | Adjusted P |
|                                                               | Female, day 1 vs. day 2              | *                   | 0.0277     |
|                                                               | Female, day 1 vs. day 3              | **                  | 0.0020     |
|                                                               | Female, day 2 vs. day 3              | ns                  | 0.7307     |
|                                                               | Male, day 1 vs. day 2                | ns                  | 0.0713     |
|                                                               | Male, day 1 vs. day 3                | *                   | 0.0109     |
|                                                               | Male, day 2 vs. day 3                | ns                  | 0.8461     |
|                                                               | Female vs. Male, day 1               | ##                  | 0.0042     |
|                                                               | Female vs. Male, day 2               | ##                  | 0.0100     |
|                                                               | Female vs. Male, day 3               | #                   | 0.0153     |
| Incorrect<br>(IC-AUC)                                         | Source of Variation                  | F (DFn, DFd)        | P          |
|                                                               | Interaction                          | F (2, 44) = 1.091   | 0.3449     |
|                                                               | Day                                  | F (2, 44) = 16.39   | <0.0001    |
|                                                               | Sex                                  | F (1, 22) = 21.79   | 0.0001     |
|                                                               | post-hoc Sidak's multiple comp. test | Summary             | Adjusted P |
|                                                               | Female, day 1 vs. day 2              | **                  | 0.0026     |
|                                                               | Female, day 1 vs. day 3              | ****                | <0.0001    |
|                                                               | Female, day 2 vs. day 3              | ns                  | 0.5360     |
|                                                               | Male, day 1 vs. day 2                | ns                  | 0.2942     |
|                                                               | Male, day 1 vs. day 3                | **                  | 0.0083     |
|                                                               | Male, day 2 vs. day 3                | ns                  | 0.3454     |
|                                                               | Female vs. Male, day 1               | ###                 | 0.0002     |
|                                                               | Female vs. Male, day 2               | #                   | 0.0319     |
|                                                               | Female vs. Male, day 3               | #                   | 0.0154     |

**Table 6** – Statistical analysis of data shown in Figure 5B for place reversal, cohort A, first pass (6-8 weeks). A *p*-value less than 0.05 is considered significant (\**p* < 0.05, \*\**p* < 0.01, \*\*\**p* < 0.001, \*\*\*\**p* < 0.0001). ns = not significant.

| <b>Figure 5B</b>                                               |                                      |                     |            |
|----------------------------------------------------------------|--------------------------------------|---------------------|------------|
| <b>Two-way RM ANOVA, place reversal, cohort A, second pass</b> |                                      |                     |            |
| Correct<br>(C-AUC)                                             | Source of Variation                  | F (DFn, DFd)        | P          |
|                                                                | Interaction                          | F (2, 38) = 0.4885  | 0.6174     |
|                                                                | Day                                  | F (2, 38) = 4.223   | 0.0221     |
|                                                                | Sex                                  | F (1, 19) = 0.02749 | 0.8701     |
|                                                                | post-hoc Sidak's multiple comp. test | Summary             | Adjusted P |
|                                                                | Female, day 1 vs. day 2              | ns                  | 0.8887     |
|                                                                | Female, day 1 vs. day 3              | ns                  | 0.2396     |
|                                                                | Female, day 2 vs. day 3              | ns                  | 0.6212     |
|                                                                | Male, day 1 vs. day 2                | ns                  | 0.1257     |
|                                                                | Male, day 1 vs. day 3                | ns                  | 0.0804     |
| Incorrect<br>(IC-AUC)                                          | Source of Variation                  | F (DFn, DFd)        | P          |
|                                                                | Interaction                          | F (2, 38) = 0.01931 | 0.9809     |
|                                                                | Day                                  | F (2, 38) = 3.059   | 0.0586     |
|                                                                | Sex                                  | F (1, 19) = 0.01156 | 0.9155     |

**Table 7** – Statistical analysis of data shown in Figure 5B for place reversal, cohort A, second pass (4-5 months). A *p*-value less than 0.05 is considered significant. ns = not significant.

| Figure 5C             | Paired <i>t</i> tests, place reversal, cohort A, pass comparison |                                  |         |          |
|-----------------------|------------------------------------------------------------------|----------------------------------|---------|----------|
| Correct<br>(C-AUC)    | Comparison                                                       | <i>t</i> , <i>df</i>             | Summary | <i>P</i> |
|                       | Female, day 1                                                    | <i>t</i> =5.188, <i>df</i> =9    | ***     | 0.0006   |
|                       | Male, day 1                                                      | <i>t</i> =0.06592, <i>df</i> =10 | ns      | 0.9487   |
|                       | Female, day 2                                                    | <i>t</i> =1.595, <i>df</i> =9    | ns      | 0.1453   |
|                       | Male, day 2                                                      | <i>t</i> =0.3032, <i>df</i> =10  | ns      | 0.7680   |
|                       | Female, day 3                                                    | <i>t</i> =3.329, <i>df</i> =9    | **      | 0.0088   |
|                       | Male, day 3                                                      | <i>t</i> =0.09445, <i>df</i> =10 | ns      | 0.9266   |
| Incorrect<br>(IC-AUC) | Comparison                                                       | <i>t</i> , <i>df</i>             | Summary | <i>P</i> |
|                       | Female, day 1                                                    | <i>t</i> =1.661, <i>df</i> =9    | ns      | 0.1310   |
|                       | Male, day 1                                                      | <i>t</i> =1.387, <i>df</i> =10   | ns      | 0.1955   |
|                       | Female, day 2                                                    | <i>t</i> =0.003776, <i>df</i> =9 | ns      | 0.9971   |
|                       | Male, day 2                                                      | <i>t</i> =1.032, <i>df</i> =10   | ns      | 0.3265   |
|                       | Female, day 3                                                    | <i>t</i> =0.6898, <i>df</i> =9   | ns      | 0.5077   |
|                       | Male, day 3                                                      | <i>t</i> =1.668, <i>df</i> =10   | ns      | 0.1263   |

**Table 8** – Statistical analysis of data shown in Figure 5C for place reversal, cohort A, pass comparison. A *p*-value less than 0.05 is considered significant (\*\**p* < 0.01, \*\*\**p* < 0.001). ns = not significant.

272 **App<sup>h/h</sup> rats in cohort B can acquire a place learning with corner switching task by 4-5 months**  
273 **of age with session-wise improvement.** Rather than progressing from place learning to place  
274 reversal as cohort A rats did, cohort B rats were started on the place learning with corner switch  
275 program after single corner restriction. This program was designed to be a faster-paced combination  
276 of place learning and place reversal, with correct corners switching every 45 minutes within a drinking  
277 session. Activity curves show marked differences between passes for both sexes, with curves for  
278 correct visits surpassing those for incorrect visits earlier during the second pass; notably, for females,  
279 the correct curve surpassed the incorrect curve by the end of the 2<sup>nd</sup> drinking session during the  
280 second pass, whereas the correct curve never surpassed the incorrect one during the first pass  
281 (Figure 6A). No significant session-wise differences in AUC were seen during the first pass for either  
282 sex, but there were significant increases in C-AUC and decreases in IC-AUC during the second pass  
283 for both sexes, more pronounced for C-AUC (Figure 6B). Sex differences were significant for each  
284 drinking session during the second pass, with C-AUC higher for females and IC-AUC lower for males  
285 (Figure 6B). For females during the second pass compared to the first pass, C-AUC was significantly  
286 higher for females for all but the 1<sup>st</sup> drinking session, while IC-AUC was only significantly different for  
287 the 4<sup>th</sup> drinking session (Figure 6C). For males during the second pass compared to the first pass, C-  
288 AUC was significantly higher for all drinking sessions, while IC-AUC was significantly lower for all

289 drinking sessions except the 2<sup>nd</sup> (Figure 6C).

**Figure 6 – Place learning with corner switch, cohort B. (A)** Activity curves showing the fractional accumulation (y-axis) of visits over drinking session time (x-axis), reset every 180 minutes, by sex and pass. Curves for correct and incorrect visits are black and blue, respectively. **(B)** Sex comparison of area under the curve (AUC) for activity curves of individual animals by visit category and pass. “\*” denotes significant comparisons within sex across program days, while “#” denotes those for the corresponding program day between sexes. Female (♀) and male (♂) data points are indicated by white and black circles, respectively. **(C)** Pass comparison of AUCs for activity curves of individual animals by sex, program day, and visit category. Data points from the first and second passes are indicated by white and red circles, respectively. All data represented as mean ± SEM (\**p* < 0.05, \*\**p* < 0.01, \*\*\**p* < 0.001, \*\*\*\**p* < 0.0001, similarly for #*p* < 0.05, etc.). See Tables 9-11 for statistical analysis. FP = first pass (6-8 weeks), SP = second pass (4-5 months), C = correct (visits), IC = incorrect (visits).

290

| <b>Figure 6B</b>      | <b>Two-way RM ANOVA, place learning with corner switch, cohort B, first pass</b> |                     |                   |
|-----------------------|----------------------------------------------------------------------------------|---------------------|-------------------|
| Correct<br>(C-AUC)    | <b>Source of Variation</b>                                                       | <b>F (DFn, DFd)</b> | <b>P</b>          |
|                       | Interaction                                                                      | F (3, 63) = 1.196   | 0.3186            |
|                       | Day                                                                              | F (3, 63) = 0.3236  | 0.8083            |
|                       | Sex                                                                              | F (1, 21) = 2.476   | 0.1306            |
| Incorrect<br>(IC-AUC) | <b>Source of Variation</b>                                                       | <b>F (DFn, DFd)</b> | <b>P</b>          |
|                       | Interaction                                                                      | F (3, 63) = 0.6067  | 0.6131            |
|                       | Day                                                                              | F (3, 63) = 1.309   | 0.2795            |
|                       | Sex                                                                              | F (1, 21) = 4.759   | 0.0406            |
|                       | <b>post-hoc Sidak's multiple comp. test</b>                                      | <b>Summary</b>      | <b>Adjusted P</b> |
|                       | Female vs. Male, day 1                                                           | ns                  | 0.9552            |
|                       | Female vs. Male, day 2                                                           | ns                  | 0.1174            |
|                       | Female vs. Male, day 3                                                           | ns                  | 0.6359            |
|                       | Female vs. Male, day 4                                                           | ns                  | 0.9713            |

**Table 9 –** Statistical analysis of data shown in Figure 6B for place learning with corner switch, cohort B, first pass (6-8 weeks). A *p*-value less than 0.05 is considered significant. ns = not significant.

| Figure 6B          | Two-way RM ANOVA, place learning with corner switch, cohort B, second pass |                   |            |
|--------------------|----------------------------------------------------------------------------|-------------------|------------|
| Correct (C-AUC)    | Source of Variation                                                        | F (DFn, DFd)      | P          |
|                    | Interaction                                                                | F (3, 60) = 1.594 | 0.2003     |
|                    | Day                                                                        | F (3, 60) = 13.62 | <0.0001    |
|                    | Sex                                                                        | F (1, 20) = 68.24 | <0.0001    |
|                    | post-hoc Sidak's multiple comp. test                                       | Summary           | Adjusted P |
|                    | Female, day 1 vs. day 4                                                    | **                | 0.0011     |
|                    | Female, day 2 vs. day 4                                                    | **                | 0.0039     |
|                    | Female, day 3 vs. day 4                                                    | **                | 0.0013     |
|                    | Male, day 1 vs. day 2                                                      | ns                | 0.8863     |
|                    | Male, day 1 vs. day 3                                                      | *                 | 0.0324     |
|                    | Male, day 1 vs. day 4                                                      | ***               | 0.0002     |
|                    | Male, day 2 vs. day 3                                                      | ns                | 0.3527     |
|                    | Male, day 2 vs. day 4                                                      | **                | 0.0068     |
|                    | Male, day 3 vs. day 4                                                      | ns                | 0.5392     |
|                    | Female vs. Male, day 1                                                     | ###               | 0.0001     |
|                    | Female vs. Male, day 2                                                     | ####              | <0.0001    |
|                    | Female vs. Male, day 3                                                     | ####              | <0.0001    |
|                    | Female vs. Male, day 4                                                     | ####              | <0.0001    |
| Incorrect (IC-AUC) | Source of Variation                                                        | F (DFn, DFd)      | P          |
|                    | Interaction                                                                | F (3, 60) = 1.427 | 0.2438     |
|                    | Day                                                                        | F (3, 60) = 7.773 | 0.0002     |
|                    | Sex                                                                        | F (1, 20) = 39.84 | <0.0001    |
|                    | post-hoc Sidak's multiple comp. test                                       | Summary           | Adjusted P |
|                    | Female, day 1 vs. day 4                                                    | ns                | 0.0821     |
|                    | Female, day 2 vs. day 4                                                    | *                 | 0.0423     |
|                    | Female, day 3 vs. day 4                                                    | ns                | 0.0773     |
|                    | Male, day 1 vs. day 2                                                      | ns                | 0.4405     |
|                    | Male, day 1 vs. day 3                                                      | ns                | 0.5832     |
|                    | Male, day 1 vs. day 4                                                      | ns                | 0.1874     |
|                    | Male, day 2 vs. day 3                                                      | *                 | 0.0122     |
|                    | Male, day 2 vs. day 4                                                      | **                | 0.0016     |
|                    | Female vs. Male, day 1                                                     | ###               | 0.0006     |
|                    | Female vs. Male, day 2                                                     | #                 | 0.0279     |
|                    | Female vs. Male, day 3                                                     | ####              | <0.0001    |
|                    | Female vs. Male, day 4                                                     | ##                | 0.0032     |

**Table 10** – Statistical analysis of data shown in Figure 6B for place learning with corner switch, cohort B, second pass (4-5 months). A  $p$ -value less than 0.05 is considered significant (\* $p$  < 0.05, \*\* $p$  < 0.01, \*\*\* $p$  < 0.001, #### $p$  < 0.0001). Some non-significant comparisons are omitted. ns = not significant.

| Figure 6C             |               | Paired <i>t</i> tests, place learning with corner switch, cohort B, pass comparison |         |          |
|-----------------------|---------------|-------------------------------------------------------------------------------------|---------|----------|
| Correct<br>(C-AUC)    | Comparison    | <i>t</i> , <i>df</i>                                                                | Summary | <i>P</i> |
|                       | Female, day 1 | <i>t</i> =1.200, <i>df</i> =9                                                       | ns      | 0.2606   |
|                       | Male, day 1   | <i>t</i> =3.645, <i>df</i> =11                                                      | **      | 0.0039   |
|                       | Female, day 2 | <i>t</i> =2.577, <i>df</i> =9                                                       | *       | 0.0298   |
|                       | Male, day 2   | <i>t</i> =5.053, <i>df</i> =11                                                      | ***     | 0.0004   |
|                       | Female, day 3 | <i>t</i> =3.192, <i>df</i> =9                                                       | *       | 0.0110   |
|                       | Male, day 3   | <i>t</i> =6.174, <i>df</i> =11                                                      | ****    | <0.0001  |
|                       | Female, day 4 | <i>t</i> =4.269, <i>df</i> =9                                                       | **      | 0.0021   |
|                       | Male, day 4   | <i>t</i> =9.086, <i>df</i> =11                                                      | ****    | <0.0001  |
| Incorrect<br>(IC-AUC) | Comparison    | <i>t</i> , <i>df</i>                                                                | Summary | <i>P</i> |
|                       | Female, day 1 | <i>t</i> =0.2539, <i>df</i> =9                                                      | ns      | 0.8053   |
|                       | Male, day 1   | <i>t</i> =2.684, <i>df</i> =11                                                      | *       | 0.0213   |
|                       | Female, day 2 | <i>t</i> =0.7319, <i>df</i> =9                                                      | ns      | 0.4828   |
|                       | Male, day 2   | <i>t</i> =0.8458, <i>df</i> =11                                                     | ns      | 0.4157   |
|                       | Female, day 3 | <i>t</i> =0.6925, <i>df</i> =9                                                      | ns      | 0.5061   |
|                       | Male, day 3   | <i>t</i> =3.845, <i>df</i> =11                                                      | **      | 0.0027   |
|                       | Female, day 4 | <i>t</i> =2.893, <i>df</i> =9                                                       | *       | 0.0178   |
|                       | Male, day 4   | <i>t</i> =4.633, <i>df</i> =11                                                      | ***     | 0.0007   |

**Table 11** – Statistical analysis of data shown in Figure 6C for place learning with corner switch, cohort B, pass comparison. A *p*-value less than 0.05 is considered significant (\**p* < 0.05, \*\**p* < 0.01, \*\*\**p* < 0.001, \*\*\*\**p* < 0.0001). ns = not significant.

**App<sup>h/h</sup> rats in cohorts A and B can acquire a behavioral sequencing task by 6-8 weeks of age with session-wise improvement.**

After place learning and place reversal (cohort A) or place learning with corner switch (cohort B), we further tested the rats' spatial learning capabilities with a behavioral sequencing program requiring the animals to shuttle between diagonally opposing corners for water access. Visits were categorized as correct (C), lateral (L), or opposite (O) as described in the methods, with activity curves generated (Figures 7A and 8A) and AUC analysis performed (Figures 7B-C and 8B-C) similarly as in other programs. Cohort A rats of both sexes during the first pass showed significant increases in C-AUC and decreases in O-AUC, but no significant changes in L-AUC (Figure 7B). These changes were consistent during the second pass for females, whereas males no longer showed significant session-wise changes in C-AUC (Figure 7B). There were significant sex differences observed for the 3<sup>rd</sup> drinking session of the first pass for C-AUC (higher in males) and L-AUC (higher in females), with no significant differences observed during the second pass (Figure 7B). For females during the second pass compared to the first, C-AUC was significantly greater for the 1<sup>st</sup> drinking session; for males, C-AUC was lower while L-AUC was higher for the 3<sup>rd</sup> drinking session (Figure 7C). Cohort B rats

307 exhibited a different activity profile: for females, the session-wise differences in C-AUC, L-AUC, and  
 308 O-AUC were minimal during both passes, whereas for males, there were many significant session-  
 309 wise differences, especially during the second pass with increases in C-AUC and decreases in L-AUC  
 310 and O-AUC (Figure 8B). Significant differences found between passes for females were sporadic for  
 311 C-AUC (1<sup>st</sup> drinking session), L-AUC (4<sup>th</sup> drinking session), and O-AUC (1<sup>st</sup> and 3<sup>rd</sup> drinking sessions);  
 312 in contrast, for males, C-AUC was significantly higher for every drinking session during the second  
 313 pass compared to the first, with L-AUC lower for every drinking session except the 1<sup>st</sup> and O-AUC  
 314 higher in the 1<sup>st</sup> and 2<sup>nd</sup> drinking sessions (Figure 8C).

**Figure 7 – Behavioral sequencing, cohort A.** (A) Activity curves showing the fractional accumulation (y-axis) of visits over drinking session time (x-axis), reset every 180 minutes, by sex and pass. Curves for correct, lateral, and opposite visits are black, blue, and red, respectively. (B) Sex comparison of area under the curve (AUC) for activity curves of individual animals by visit category and pass. “\*” denotes significant comparisons within sex across program days, while “#” denotes those for the corresponding program day between sexes. Female (♀) and male (♂) data points are indicated by white and black circles, respectively. (C) Pass comparison of AUCs for activity curves of individual animals by sex, program day, and visit category. Data points from the first and second passes are indicated by white and red circles, respectively. All data are represented as mean ± SEM (\* $p < 0.05$ , \*\* $p < 0.01$ , \*\*\* $p < 0.001$ , \*\*\*\* $p < 0.0001$ , similarly for # $p < 0.05$ , etc.). See Tables 12-14 for statistical analysis. FP = first pass (6-8 weeks), SP = second pass (4-5 months), C = correct (visits), L = lateral (visits), O = opposite (visits).

**Figure 8 – Behavioral sequencing, cohort B.** (A) Activity curves showing the fractional accumulation (y-axis) of visits over drinking session time (x-axis), reset every 180 minutes, by sex and pass. Curves for correct, lateral, and opposite visits are black, blue, and red, respectively. (B) Sex comparison of area under the curve (AUC) for activity curves of individual animals by visit category and pass. “\*” denotes significant comparisons within sex across program days, while “#” denotes those for the corresponding program day between sexes. Female (♀) and male (♂) data points are indicated by white and black circles, respectively. (C) Pass comparison of AUCs for activity curves of individual animals by sex, program day, and visit category. Data points from the first and second passes are indicated by white and red circles, respectively. All data are represented as mean ± SEM (\* $p < 0.05$ , \*\* $p < 0.01$ , \*\*\* $p < 0.001$ , \*\*\*\* $p < 0.0001$ , similarly for # $p < 0.05$ , etc.). See Tables 15-17 for statistical analysis. FP = first pass (6-8 weeks), SP = second pass (4-5 months), C = correct (visits), L = lateral (visits), O = opposite (visits).

| <b>Figure 7B</b>                                                     |                                             |                     |                   |
|----------------------------------------------------------------------|---------------------------------------------|---------------------|-------------------|
| <b>Two-way RM ANOVA, behavioral sequencing, cohort A, first pass</b> |                                             |                     |                   |
| Correct<br>(C-AUC)                                                   | <b>Source of Variation</b>                  | <b>F (DFn, DFd)</b> | <b>P</b>          |
|                                                                      | Interaction                                 | F (2, 44) = 3.323   | 0.0453            |
|                                                                      | Day                                         | F (2, 44) = 22.41   | <0.0001           |
|                                                                      | Sex                                         | F (1, 22) = 2.906   | 0.1023            |
|                                                                      | <b>post-hoc Sidak's multiple comp. test</b> | <b>Summary</b>      | <b>Adjusted P</b> |
|                                                                      | Female, day 1 vs. day 2                     | ns                  | 0.2721            |
|                                                                      | Female, day 1 vs. day 3                     | *                   | 0.0168            |
|                                                                      | Female, day 2 vs. day 3                     | ns                  | 0.5330            |
|                                                                      | Male, day 1 vs. day 2                       | ***                 | 0.0004            |
|                                                                      | Male, day 1 vs. day 3                       | ****                | <0.0001           |
|                                                                      | Male, day 2 vs. day 3                       | ns                  | 0.0775            |
| Lateral<br>(L-AUC)                                                   | <b>Source of Variation</b>                  | <b>F (DFn, DFd)</b> | <b>P</b>          |
|                                                                      | Interaction                                 | F (2, 44) = 1.391   | 0.2595            |
|                                                                      | Day                                         | F (2, 44) = 0.6175  | 0.5439            |
|                                                                      | Sex                                         | F (1, 22) = 7.170   | 0.0137            |
|                                                                      | <b>post-hoc Sidak's multiple comp. test</b> | <b>Summary</b>      | <b>Adjusted P</b> |
|                                                                      | Female vs. Male, day 1                      | ns                  | 0.2961            |
|                                                                      | Female vs. Male, day 2                      | ns                  | 0.0578            |
|                                                                      | Female vs. Male, day 3                      | #                   | 0.0109            |
| Opposite<br>(O-AUC)                                                  | <b>Source of Variation</b>                  | <b>F (DFn, DFd)</b> | <b>P</b>          |
|                                                                      | Interaction                                 | F (2, 44) = 0.09638 | 0.9083            |
|                                                                      | Day                                         | F (2, 44) = 15.98   | <0.0001           |
|                                                                      | Sex                                         | F (1, 22) = 2.116   | 0.1599            |
|                                                                      | <b>post-hoc Sidak's multiple comp. test</b> | <b>Summary</b>      | <b>Adjusted P</b> |
|                                                                      | Female, day 1 vs. day 2                     | **                  | 0.0055            |
|                                                                      | Female, day 1 vs. day 3                     | **                  | 0.0039            |
|                                                                      | Female, day 2 vs. day 3                     | ns                  | 0.9992            |
|                                                                      | Male, day 1 vs. day 2                       | **                  | 0.0088            |
|                                                                      | Male, day 1 vs. day 3                       | **                  | 0.0011            |
|                                                                      | Male, day 2 vs. day 3                       | ns                  | 0.8555            |

**Table 12** – Statistical analysis of data shown in Figure 7B for behavioral sequencing, cohort A, first pass (6-8 weeks). A *p*-value less than 0.05 is considered significant (\**p* < 0.05, \*\**p* < 0.01, \*\*\**p* < 0.001, \*\*\*\**p* < 0.0001). ns = not significant.

|     |                     |                                                                       |                     |                   |
|-----|---------------------|-----------------------------------------------------------------------|---------------------|-------------------|
| 318 | <b>Figure 7B</b>    | <b>Two-way RM ANOVA, behavioral sequencing, cohort A, second pass</b> |                     |                   |
|     | Correct<br>(C-AUC)  | <b>Source of Variation</b>                                            | <b>F (DFn, DFd)</b> | <b>P</b>          |
| 319 |                     | Interaction                                                           | F (2, 38) = 1.537   | 0.2281            |
|     |                     | Day                                                                   | F (2, 38) = 5.618   | 0.0073            |
|     |                     | Sex                                                                   | F (1, 19) = 3.569   | 0.0742            |
| 320 |                     | <b>post-hoc Sidak's multiple comp. test</b>                           | <b>Summary</b>      | <b>Adjusted P</b> |
|     |                     | Female, day 1 vs. day 2                                               | *                   | 0.0474            |
| 321 |                     | Female, day 1 vs. day 3                                               | *                   | 0.0278            |
|     |                     | Female, day 2 vs. day 3                                               | ns                  | 0.9950            |
| 322 |                     | Male, day 1 vs. day 2                                                 | ns                  | 0.9988            |
|     |                     | Male, day 1 vs. day 3                                                 | ns                  | 0.1598            |
|     |                     | Male, day 2 vs. day 3                                                 | ns                  | 0.2075            |
| 323 | Lateral<br>(L-AUC)  | <b>Source of Variation</b>                                            | <b>F (DFn, DFd)</b> | <b>P</b>          |
|     |                     | Interaction                                                           | F (2, 38) = 0.07518 | 0.9277            |
| 324 |                     | Day                                                                   | F (2, 38) = 0.4424  | 0.6458            |
|     |                     | Sex                                                                   | F (1, 19) = 0.5818  | 0.4550            |
| 325 | Opposite<br>(O-AUC) | <b>Source of Variation</b>                                            | <b>F (DFn, DFd)</b> | <b>P</b>          |
|     |                     | Interaction                                                           | F (2, 38) = 0.7340  | 0.4867            |
|     |                     | Day                                                                   | F (2, 38) = 12.12   | <0.0001           |
|     |                     | Sex                                                                   | F (1, 19) = 0.00986 | 0.9219            |
| 326 |                     | <b>post-hoc Sidak's multiple comp. test</b>                           | <b>Summary</b>      | <b>Adjusted P</b> |
|     |                     | Female, day 1 vs. day 2                                               | *                   | 0.0395            |
| 327 |                     | Female, day 1 vs. day 3                                               | ***                 | 0.0006            |
|     |                     | Female, day 2 vs. day 3                                               | ns                  | 0.3448            |
| 328 |                     | Male, day 1 vs. day 2                                                 | ns                  | 0.1123            |
|     |                     | Male, day 1 vs. day 3                                                 | *                   | 0.0379            |
|     |                     | Male, day 2 vs. day 3                                                 | ns                  | 0.9526            |

**Table 13** – Statistical analysis of data shown in Figure 7B for behavioral sequencing, cohort A, second pass (4-5 months). A *p*-value less than 0.05 is considered significant (\**p* < 0.05, \*\*\**p* < 0.001). ns = not significant.

| <b>Figure 7C</b>    | <b>Paired <i>t</i> tests, behavioral sequencing, cohort A, pass comparison</b> |                 |                |          |
|---------------------|--------------------------------------------------------------------------------|-----------------|----------------|----------|
|                     | <b>Comparison</b>                                                              | <b>t, df</b>    | <b>Summary</b> | <b>P</b> |
| Correct<br>(C-AUC)  | Female, day 1                                                                  | t=2.491, df=8   | *              | 0.0375   |
|                     | Male, day 1                                                                    | t=0.2282, df=11 | ns             | 0.8237   |
|                     | Female, day 2                                                                  | t=1.032, df=8   | ns             | 0.3324   |
|                     | Male, day 2                                                                    | t=1.474, df=11  | ns             | 0.1686   |
|                     | Female, day 3                                                                  | t=1.177, df=8   | ns             | 0.2728   |
|                     | Male, day 3                                                                    | t=1.844, df=11  | ns             | 0.0923   |
| Lateral<br>(L-AUC)  | <b>Comparison</b>                                                              | <b>t, df</b>    | <b>Summary</b> | <b>P</b> |
|                     | Female, day 1                                                                  | t=0.9930, df=8  | ns             | 0.3498   |
|                     | Male, day 1                                                                    | t=1.502, df=11  | ns             | 0.1613   |
|                     | Female, day 2                                                                  | t=1.498, df=8   | ns             | 0.1724   |
|                     | Male, day 2                                                                    | t=2.034, df=11  | ns             | 0.0668   |
|                     | Female, day 3                                                                  | t=0.3042, df=8  | ns             | 0.7687   |
|                     | Male, day 3                                                                    | t=3.328, df=11  | **             | 0.0067   |
| Opposite<br>(O-AUC) | <b>Comparison</b>                                                              | <b>t, df</b>    | <b>Summary</b> | <b>P</b> |
|                     | Female, day 1                                                                  | t=0.9581, df=8  | ns             | 0.3661   |
|                     | Male, day 1                                                                    | t=0.9490, df=11 | ns             | 0.3630   |
|                     | Female, day 2                                                                  | t=0.6758, df=8  | ns             | 0.5182   |
|                     | Male, day 2                                                                    | t=1.496, df=11  | ns             | 0.1628   |
|                     | Female, day 3                                                                  | t=0.4350, df=8  | ns             | 0.6751   |
|                     | Male, day 3                                                                    | t=0.7209, df=11 | ns             | 0.4860   |

**Table 14** – Statistical analysis of data shown in Figure 7C for behavioral sequencing, cohort A, pass comparison. A *p*-value less than 0.05 is considered significant (\**p* < 0.05, \*\**p* < 0.01). ns = not significant.

| Figure 8B           | Mixed-effects analysis, behavioral sequencing, cohort B, first pass |                    |            |
|---------------------|---------------------------------------------------------------------|--------------------|------------|
| Correct<br>(C-AUC)  | Source of Variation                                                 | F (DFn, DFd)       | P          |
|                     | Interaction                                                         | F (4, 77) = 1.576  | 0.1891     |
|                     | Day                                                                 | F (4, 77) = 6.336  | 0.0002     |
|                     | Sex                                                                 | F (1, 21) = 0.5258 | 0.4764     |
|                     | post-hoc Sidak's multiple comp. test                                | Summary            | Adjusted P |
|                     | Female, day 1 vs. day 2                                             | ns                 | >0.9999    |
|                     | Female, day 1 vs. day 3                                             | ns                 | >0.9999    |
|                     | Female, day 1 vs. day 4                                             | ns                 | 0.9681     |
|                     | Female, day 1 vs. day 5                                             | ns                 | 0.5746     |
|                     | Female, day 2 vs. day 3                                             | ns                 | >0.9999    |
|                     | Female, day 2 vs. day 4                                             | ns                 | 0.9994     |
|                     | Female, day 2 vs. day 5                                             | ns                 | 0.8721     |
|                     | Female, day 3 vs. day 4                                             | ns                 | 0.9980     |
|                     | Female, day 3 vs. day 5                                             | ns                 | 0.8138     |
|                     | Female, day 4 vs. day 5                                             | ns                 | 0.9987     |
|                     | Male, day 1 vs. day 2                                               | ns                 | 0.6038     |
|                     | Male, day 1 vs. day 3                                               | ns                 | 0.0745     |
|                     | Male, day 1 vs. day 4                                               | ***                | 0.0004     |
|                     | Male, day 1 vs. day 5                                               | ***                | 0.0002     |
|                     | Male, day 2 vs. day 3                                               | ns                 | 0.9644     |
|                     | Male, day 2 vs. day 4                                               | ns                 | 0.0898     |
|                     | Male, day 2 vs. day 5                                               | *                  | 0.0388     |
|                     | Male, day 3 vs. day 4                                               | ns                 | 0.7651     |
|                     | Male, day 3 vs. day 5                                               | ns                 | 0.4960     |
|                     | Male, day 4 vs. day 5                                               | ns                 | >0.9999    |
| Lateral<br>(L-AUC)  | Source of Variation                                                 | F (DFn, DFd)       | P          |
|                     | Interaction                                                         | F (4, 77) = 1.215  | 0.3114     |
|                     | Day                                                                 | F (4, 77) = 1.408  | 0.2394     |
|                     | Sex                                                                 | F (1, 21) = 0.0001 | 0.9910     |
| Opposite<br>(O-AUC) | Source of Variation                                                 | F (DFn, DFd)       | P          |
|                     | Interaction                                                         | F (4, 77) = 0.7529 | 0.5592     |
|                     | Day                                                                 | F (4, 77) = 0.4977 | 0.7374     |
|                     | Sex                                                                 | F (1, 21) = 0.0369 | 0.8496     |

**Table 15** – Statistical analysis of data shown in Figure 8B for behavioral sequencing, cohort B, first pass (6-8 weeks). A *p*-value less than 0.05 is considered significant (\**p* < 0.05, \*\*\**p* < 0.001). ns = not significant.

| <b>Figure 8B</b>    | <b>Two-way RM ANOVA, behavioral sequencing, cohort B, second pass</b> |                     |                   |
|---------------------|-----------------------------------------------------------------------|---------------------|-------------------|
| Correct<br>(C-AUC)  | <b>Source of Variation</b>                                            | <b>F (DFn, DFd)</b> | <b>P</b>          |
|                     | Interaction                                                           | F (4, 76) = 32.02   | <0.0001           |
|                     | Day                                                                   | F (4, 76) = 46.43   | <0.0001           |
|                     | Sex                                                                   | F (1, 19) = 84.69   | <0.0001           |
|                     | <b>post-hoc Sidak's multiple comparisons test</b>                     | <b>Summary</b>      | <b>Adjusted P</b> |
|                     | Male, day 1 vs. days 2, 3, 4, 5                                       | ****                | <0.0001           |
|                     | Male, day 2 vs. day 3                                                 | ****                | <0.0001           |
|                     | Male, day 2 vs. day 4                                                 | ****                | <0.0001           |
|                     | Male, day 2 vs. day 5                                                 | ****                | <0.0001           |
|                     | Female vs Male, day 2                                                 | ####                | <0.0001           |
|                     | Female vs Male, day 3                                                 | ####                | <0.0001           |
|                     | Female vs Male, day 4                                                 | ####                | <0.0001           |
|                     | Female vs Male, day 5                                                 | ####                | <0.0001           |
| Lateral<br>(L-AUC)  | <b>Source of Variation</b>                                            | <b>F (DFn, DFd)</b> | <b>P</b>          |
|                     | Interaction                                                           | F (4, 76) = 3.906   | 0.0061            |
|                     | Day                                                                   | F (4, 76) = 7.183   | <0.0001           |
|                     | Sex                                                                   | F (1, 19) = 13.76   | 0.0015            |
|                     | <b>post-hoc Sidak's multiple comparisons test</b>                     | <b>Summary</b>      | <b>Adjusted P</b> |
|                     | Female, day 4 vs. day 5                                               | *                   | 0.0155            |
|                     | Male, day 1 vs. day 3                                                 | ***                 | 0.0006            |
|                     | Male, day 1 vs. day 4                                                 | ***                 | 0.0001            |
|                     | Male, day 1 vs. day 5                                                 | ***                 | 0.0001            |
|                     | Female vs. male, day 3                                                | ##                  | 0.0011            |
|                     | Female vs. male, day 4                                                | ####                | <0.0001           |
| Opposite<br>(O-AUC) | <b>Source of Variation</b>                                            | <b>F (DFn, DFd)</b> | <b>P</b>          |
|                     | Interaction                                                           | F (4, 76) = 3.607   | 0.0096            |
|                     | Day                                                                   | F (4, 76) = 13.74   | <0.0001           |
|                     | Sex                                                                   | F (1, 19) = 0.1984  | 0.6611            |
|                     | <b>post-hoc Sidak's multiple comparisons test</b>                     | <b>Summary</b>      | <b>Adjusted P</b> |
|                     | Male, day 1 vs. day 2                                                 | *                   | 0.0227            |
|                     | Male, day 1 vs. day 3                                                 | ***                 | 0.0004            |
|                     | Male, day 1 vs. day 4                                                 | ****                | <0.0001           |
|                     | Male, day 1 vs. day 5                                                 | ****                | <0.0001           |
|                     | Male, day 2 vs. day 4                                                 | *                   | 0.0307            |
|                     | Male, day 2 vs. day 5                                                 | **                  | 0.0014            |

**Table 16** – Statistical analysis of data shown in Figure 8B for behavioral sequencing, cohort B, second pass (4-5 months). A *p*-value less than 0.05 is considered significant (\**p* < 0.05, \*\**p* < 0.01, \*\*\**p* < 0.001, \*\*\*\*/####*p* < 0.0001). Non-significant comparisons have been omitted.

| Figure 8C        | Paired t tests, behavioral sequencing, cohort B, pass comparison |                 |         |         |
|------------------|------------------------------------------------------------------|-----------------|---------|---------|
| Correct (C-AUC)  | Comparison                                                       | t, df           | Summary | P       |
|                  | Female, day 1                                                    | t=2.393, df=9   | *       | 0.0403  |
|                  | Male, day 1                                                      | t=2.266, df=9   | *       | 0.0497  |
|                  | Female, day 2                                                    | t=0.8613, df=9  | ns      | 0.4114  |
|                  | Male, day 2                                                      | t=4.899, df=9   | ***     | 0.0008  |
|                  | Female, day 3                                                    | t=0.8399, df=9  | ns      | 0.4227  |
|                  | Male, day 3                                                      | t=10.14, df=9   | ****    | <0.0001 |
|                  | Female, day 4                                                    | t=1.226, df=9   | ns      | 0.2512  |
|                  | Male, day 4                                                      | t=7.283, df=9   | ****    | <0.0001 |
|                  | Female, day 5                                                    | t=1.809, df=9   | ns      | 0.1039  |
|                  | Male, day 5                                                      | t=7.034, df=9   | ****    | <0.0001 |
| Lateral (L-AUC)  | Comparison                                                       | t, df           | Summary | P       |
|                  | Female, day 1                                                    | t=1.466, df=9   | ns      | 0.1768  |
|                  | Male, day 1                                                      | t=2.158, df=9   | ns      | 0.0593  |
|                  | Female, day 2                                                    | t=0.6829, df=9  | ns      | 0.5118  |
|                  | Male, day 2                                                      | t=2.293, df=9   | *       | 0.0475  |
|                  | Female, day 3                                                    | t=0.4833, df=9  | ns      | 0.6404  |
|                  | Male, day 3                                                      | t=3.887, df=9   | **      | 0.0037  |
|                  | Female, day 4                                                    | t=2.374, df=9   | *       | 0.0416  |
|                  | Male, day 4                                                      | t=3.201, df=9   | *       | 0.0108  |
|                  | Female, day 5                                                    | t=0.5710, df=9  | ns      | 0.5820  |
|                  | Male, day 5                                                      | t=3.066, df=9   | *       | 0.0134  |
| Opposite (O-AUC) | Comparison                                                       | t, df           | Summary | P       |
|                  | Female, day 1                                                    | t=3.144, df=9   | *       | 0.0119  |
|                  | Male, day 1                                                      | t=3.901, df=9   | **      | 0.0036  |
|                  | Female, day 2                                                    | t=1.403, df=9   | ns      | 0.1942  |
|                  | Male, day 2                                                      | t=3.349, df=9   | **      | 0.0085  |
|                  | Female, day 3                                                    | t=2.459, df=9   | *       | 0.0362  |
|                  | Male, day 3                                                      | t=1.407, df=9   | ns      | 0.1931  |
|                  | Female, day 4                                                    | t=0.4780, df=9  | ns      | 0.6441  |
|                  | Male, day 4                                                      | t=0.6623, df=9  | ns      | 0.5244  |
|                  | Female, day 5                                                    | t=0.08419, df=9 | ns      | 0.9347  |
|                  | Male, day 5                                                      | t=0.5445, df=9  | ns      | 0.5993  |

**Table 17** – Statistical analysis of data shown in Figure 8C for behavioral sequencing, cohort B, pass comparison. A *p*-value less than 0.05 is considered significant (\**p* < 0.05, \*\**p* < 0.01, \*\*\**p* < 0.001, \*\*\*\**p* < 0.0001). ns = not significant.

**App<sup>h/h</sup> rats in cohort A and B may not be able to acquire a serial reversal task by 4-5 months of age.**

335 We ended the timeline for both cohorts with a serial reversal program designed to add a layer of  
 336 complexity to behavioral sequencing by requiring the rats to alternate diagonals after every eight  
 337 correct nosepokes. For cohort A, qualitatively, activity curves for both sexes did not show much  
 338 difference between passes or session-wise improvement (Figure 9A). Session-wise differences in  
 339 AUC were minimal for both sexes during both passes, with some significant sex differences during the  
 340 second pass (Figure 9B). Significant differences between passes were sporadic for females in L-AUC  
 341 (2<sup>nd</sup> drinking session) and O-AUC (1<sup>st</sup> drinking session), and non-existent for males (Figure 9C). For  
 342 cohort B, the activity curves show a possible difference between the first and second pass for males,  
 343 but no session-wise differences (Figure 10A). AUC analysis revealed that for males compared to  
 344 females during the second pass, C-AUC was significantly higher for all drinking sessions, with O-AUC  
 345 significantly lower for the 3<sup>rd</sup> and 4<sup>th</sup> drinking sessions (Figure 10B). For males during the second pass  
 346 compared to the first, C-AUC was significantly higher for every drinking session, with L-AUC  
 347 significantly higher for the 4<sup>th</sup> drinking session; significant differences between passes were non-  
 348 existent for females (Figure 10C).

**Figure 9 – Serial reversal, cohort A. (A)** Activity curves showing the fractional accumulation (y-axis) of visits over drinking session time (x-axis), reset every 180 minutes, by sex and pass. Curves for correct, lateral, and opposite visits are black, blue, and red, respectively. **(B)** Sex comparison of area under the curve (AUC) for activity curves of individual animals by visit category and pass. “\*” denotes significant comparisons within sex across program days, while “#” denotes those for the corresponding program day between sexes. Female (♀) and male (♂) data points are indicated by white and black circles, respectively. **(C)** Pass comparison of AUCs for activity curves of individual animals by sex, program day, and visit category. Data points from the first and second passes are indicated by white and red circles, respectively. All data are represented as mean ± SEM (\**p* < 0.05, \*\**p* < 0.01, \*\*\**p* < 0.001, \*\*\*\**p* < 0.0001, similarly for #*p* < 0.05, etc.). See Tables 18-20 for statistical analysis. FP = first pass (6-8 weeks), SP = second pass (4-5 months), C = correct (visits), L = lateral (visits), O = opposite (visits).

**Figure 10 – Serial reversal, cohort B. (A)** Activity curves showing the fractional accumulation (y-axis) of visits over drinking session time (x-axis), reset every 180 minutes, by sex and pass. Curves for correct, lateral, and opposite visits are black, blue, and red, respectively. **(B)** Sex comparison of area under the curve (AUC) for activity curves of individual animals by visit category and pass. “\*” denotes significant comparisons within sex across program days, while “#” denotes those for the corresponding program day between sexes. Female (♀) and male (♂) data points are indicated by white and black circles, respectively. **(C)** Pass comparison of AUCs for activity curves of individual animals by sex, program day and visit category. Data points from the first and second passes are indicated by white and red circles, respectively. All data are represented as mean ± SEM (\* $p < 0.05$ , \*\* $p < 0.01$ , \*\*\* $p < 0.001$ , \*\*\*\* $p < 0.0001$ , similarly for # $p < 0.05$ , etc.). See Tables 21-23 for statistical analysis. FP = first pass (6-8 weeks), SP = second pass (4-5 months), C = correct (visits), L = lateral (visits), O = opposite (visits).

| <b>Figure 9B</b>                                               |                            |                     |          |
|----------------------------------------------------------------|----------------------------|---------------------|----------|
| <b>Two-way RM ANOVA, serial reversal, cohort A, first pass</b> |                            |                     |          |
| Correct<br>(C-AUC)                                             | <b>Source of Variation</b> | <b>F (DFn, DFd)</b> | <b>P</b> |
|                                                                | Interaction                | F (3, 66) = 0.3061  | 0.8209   |
|                                                                | Day                        | F (3, 66) = 0.4277  | 0.7338   |
|                                                                | Sex                        | F (1, 22) = 0.5099  | 0.4827   |
| Lateral<br>(L-AUC)                                             | <b>Source of Variation</b> | <b>F (DFn, DFd)</b> | <b>P</b> |
|                                                                | Interaction                | F (3, 66) = 0.9907  | 0.4027   |
|                                                                | Day                        | F (3, 66) = 0.5091  | 0.6774   |
|                                                                | Sex                        | F (1, 22) = 0.00011 | 0.9915   |
| Opposite<br>(O-AUC)                                            | <b>Source of Variation</b> | <b>F (DFn, DFd)</b> | <b>P</b> |
|                                                                | Interaction                | F (3, 66) = 0.4999  | 0.6837   |
|                                                                | Day                        | F (3, 66) = 2.051   | 0.1152   |
|                                                                | Sex                        | F (1, 22) = 0.0628  | 0.8044   |

**Table 18** – Statistical analysis of data shown in Figure 9B for serial reversal, cohort A, first pass (6-8 weeks). A  $p$ -value less than 0.05 is considered significant.

| <b>Figure 9B</b>    | <b>Mixed-effects analysis, serial reversal, cohort A, second pass</b> |                     |                   |
|---------------------|-----------------------------------------------------------------------|---------------------|-------------------|
| Correct<br>(C-AUC)  | <b>Source of Variation</b>                                            | <b>F (DFn, DFd)</b> | <b>P</b>          |
|                     | Interaction                                                           | F (3, 53) = 0.6830  | 0.5664            |
|                     | Day                                                                   | F (3, 53) = 2.568   | 0.0641            |
|                     | Sex                                                                   | F (1, 19) = 5.754   | 0.0269            |
|                     | <b>post-hoc Sidak's multiple comp. test</b>                           | <b>Summary</b>      | <b>Adjusted P</b> |
|                     | Female vs. Male, day 1                                                | ns                  | 0.8521            |
|                     | Female vs. Male, day 2                                                | ns                  | 0.1465            |
|                     | Female vs. Male, day 3                                                | ns                  | 0.1190            |
|                     | Female vs. Male, day 4                                                | ns                  | 0.1574            |
| Lateral<br>(L-AUC)  | <b>Source of Variation</b>                                            | <b>F (DFn, DFd)</b> | <b>P</b>          |
|                     | Interaction                                                           | F (3, 53) = 1.923   | 0.1370            |
|                     | Day                                                                   | F (3, 53) = 0.5768  | 0.6328            |
|                     | Sex                                                                   | F (1, 19) = 10.73   | 0.0040            |
|                     | <b>post-hoc Sidak's multiple comp. test</b>                           | <b>Summary</b>      | <b>Adjusted P</b> |
|                     | Female vs. male, day 1                                                | ns                  | 0.9988            |
|                     | Female vs. male, day 2                                                | #                   | 0.0228            |
|                     | Female vs. male, day 3                                                | #                   | 0.0203            |
|                     | Female vs. male, day 4                                                | ns                  | 0.8612            |
| Opposite<br>(O-AUC) | <b>Source of Variation</b>                                            | <b>F (DFn, DFd)</b> | <b>P</b>          |
|                     | Interaction                                                           | F (3, 53) = 2.117   | 0.1090            |
|                     | Day                                                                   | F (3, 53) = 1.178   | 0.3271            |
|                     | Sex                                                                   | F (1, 19) = 1.600   | 0.2212            |

**Table 19** – Statistical analysis of data shown in Figure 9B for serial reversal, cohort A, second pass (4-5 months). A *p*-value less than 0.05 is considered significant (*#p* < 0.05). ns = not significant.

| <b>Figure 9C</b>                                                         |                   |                 |                |          |
|--------------------------------------------------------------------------|-------------------|-----------------|----------------|----------|
| <b>Paired <i>t</i> tests, serial reversal, cohort A, pass comparison</b> |                   |                 |                |          |
| Correct<br>(C-AUC)                                                       | <b>Comparison</b> | <b>t, df</b>    | <b>Summary</b> | <b>P</b> |
|                                                                          | Female, day 1     | t=0.1544, df=9  | ns             | 0.8807   |
|                                                                          | Male, day 1       | t=0.0315, df=9  | ns             | 0.9756   |
|                                                                          | Female, day 2     | t=0.1535, df=9  | ns             | 0.8814   |
|                                                                          | Male, day 2       | t=1.396, df=11  | ns             | 0.1902   |
|                                                                          | Female, day 3     | t=0.6986, df=9  | ns             | 0.5024   |
|                                                                          | Male, day 3       | t=0.8514, df=8  | ns             | 0.4193   |
|                                                                          | Female, day 4     | t=0.2108, df=9  | ns             | 0.8377   |
|                                                                          | Male, day 4       | t=0.9781, df=9  | ns             | 0.3536   |
| Lateral<br>(L-AUC)                                                       | <b>Comparison</b> | <b>t, df</b>    | <b>Summary</b> | <b>P</b> |
|                                                                          | Female, day 1     | t=0.3688, df=9  | ns             | 0.7208   |
|                                                                          | Male, day 1       | t=0.1354, df=9  | ns             | 0.8952   |
|                                                                          | Female, day 2     | t=4.072, df=9   | **             | 0.0028   |
|                                                                          | Male, day 2       | t=1.438, df=10  | ns             | 0.1809   |
|                                                                          | Female, day 3     | t=1.231, df=9   | ns             | 0.2496   |
|                                                                          | Male, day 3       | t=1.156, df=8   | ns             | 0.2809   |
|                                                                          | Female, day 4     | t=0.6974, df=9  | ns             | 0.5031   |
|                                                                          | Male, day 4       | t=1.581, df=9   | ns             | 0.1483   |
| Opposite<br>(O-AUC)                                                      | <b>Comparison</b> | <b>t, df</b>    | <b>Summary</b> | <b>P</b> |
|                                                                          | Female, day 1     | t=2.629, df=9   | *              | 0.0274   |
|                                                                          | Male, day 1       | t=0.2406, df=10 | ns             | 0.8147   |
|                                                                          | Female, day 2     | t=0.8891, df=9  | ns             | 0.3971   |
|                                                                          | Male, day 2       | t=0.1268, df=10 | ns             | 0.9016   |
|                                                                          | Female, day 3     | t=0.6236, df=9  | ns             | 0.5483   |
|                                                                          | Male, day 3       | t=0.1706, df=8  | ns             | 0.8688   |
|                                                                          | Female, day 4     | t=0.7629, df=9  | ns             | 0.4651   |
|                                                                          | Male, day 4       | t=0.4479, df=9  | ns             | 0.6648   |

**Table 20** – Statistical analysis of data shown in Figure 7C for serial reversal, cohort A, pass comparison. A *p*-value less than 0.05 is considered significant (\**p* < 0.05, \*\**p* < 0.01). ns = not significant.

| Figure 10B       | Mixed-effects analysis, serial reversal, cohort B, first pass |                    |        |
|------------------|---------------------------------------------------------------|--------------------|--------|
|                  | Source of Variation                                           | F (DFn, DFd)       | P      |
| Correct (C-AUC)  | Interaction                                                   | F (3, 52) = 1.150  | 0.3378 |
|                  | Day                                                           | F (3, 52) = 0.3990 | 0.7542 |
|                  | Sex                                                           | F (1, 19) = 0.8525 | 0.3674 |
| Lateral (L-AUC)  | Source of Variation                                           | F (DFn, DFd)       | P      |
|                  | Interaction                                                   | F (3, 52) = 0.9508 | 0.4229 |
|                  | Day                                                           | F (3, 52) = 0.5477 | 0.6519 |
| Opposite (O-AUC) | Sex                                                           | F (1, 19) = 0.0230 | 0.8811 |
|                  | Source of Variation                                           | F (DFn, DFd)       | P      |
|                  | Interaction                                                   | F (3, 52) = 0.1502 | 0.9291 |
|                  | Day                                                           | F (3, 52) = 0.7863 | 0.5070 |
|                  | Sex                                                           | F (1, 19) = 1.071  | 0.3136 |

**Table 21** – Statistical analysis of data shown in Figure 10B for serial reversal, cohort B, first pass (6-8 weeks). A *p*-value less than 0.05 is considered significant.

| Figure 10B       | Two-way RM ANOVA, serial reversal, cohort B, second pass |                    |            |
|------------------|----------------------------------------------------------|--------------------|------------|
|                  | Source of Variation                                      | F (DFn, DFd)       | P          |
| Correct (C-AUC)  | Interaction                                              | F (3, 57) = 1.357  | 0.2652     |
|                  | Day                                                      | F (3, 57) = 1.391  | 0.2548     |
|                  | Sex                                                      | F (1, 19) = 69.20  | <0.0001    |
|                  | post-hoc Sidak's multiple comp. test                     | Summary            | Adjusted P |
|                  | Female vs. Male, day 1                                   | ####               | <0.0001    |
|                  | Female vs. Male, day 2                                   | ####               | <0.0001    |
|                  | Female vs. Male, day 3                                   | ####               | <0.0001    |
|                  | Female vs. Male, day 4                                   | ####               | <0.0001    |
|                  |                                                          |                    |            |
| Lateral (L-AUC)  | Source of Variation                                      | F (DFn, DFd)       | P          |
|                  | Interaction                                              | F (3, 57) = 0.0096 | 0.9987     |
|                  | Day                                                      | F (3, 57) = 0.1552 | 0.9259     |
| Opposite (O-AUC) | Sex                                                      | F (1, 19) = 2.888  | 0.1056     |
|                  | Source of Variation                                      | F (DFn, DFd)       | P          |
|                  | Interaction                                              | F (3, 57) = 0.6388 | 0.5932     |
|                  | Day                                                      | F (3, 57) = 0.0676 | 0.9769     |
|                  | Sex                                                      | F (1, 19) = 20.49  | 0.0002     |
|                  | post-hoc Sidak's multiple comp. test                     | Summary            | Adjusted P |
|                  | Female vs. Male, day 1                                   | ns                 | 0.2627     |
|                  | Female vs. Male, day 2                                   | ns                 | 0.1193     |
|                  | Female vs. Male, day 3                                   | #                  | 0.0146     |
|                  | Female vs. Male, day 4                                   | ##                 | 0.0034     |

**Table 22** – Statistical analysis of data shown in Figure 10B for serial reversal, cohort B, second pass (4-5 months). A *p*-value less than 0.05 is considered significant (\**p* < 0.05, \*\**p* < 0.01, \*\*\*\**p* < 0.0001). ns = not significant.

| Figure 10C       | Paired t tests, serial reversal, cohort B, pass comparison |                |         |        |
|------------------|------------------------------------------------------------|----------------|---------|--------|
| Correct (C-AUC)  | Comparison                                                 | t, df          | Summary | P      |
|                  | Female, day 1                                              | t=0.8066, df=9 | ns      | 0.4407 |
|                  | Male, day 1                                                | t=5.117, df=9  | ***     | 0.0006 |
|                  | Female, day 2                                              | t=0.5204, df=9 | ns      | 0.6153 |
|                  | Male, day 2                                                | t=5.011, df=8  | **      | 0.0010 |
|                  | Female, day 3                                              | t=0.4795, df=9 | ns      | 0.6430 |
|                  | Male, day 3                                                | t=5.852, df=7  | ***     | 0.0006 |
|                  | Female, day 4                                              | t=0.7748, df=9 | ns      | 0.4583 |
|                  | Male, day 4                                                | t=3.116, df=7  | *       | 0.0169 |
| Lateral (L-AUC)  | Comparison                                                 | t, df          | Summary | P      |
|                  | Female, day 1                                              | t=0.4160, df=9 | ns      | 0.6872 |
|                  | Male, day 1                                                | t=1.975, df=9  | ns      | 0.0797 |
|                  | Female, day 2                                              | t=0.7012, df=9 | ns      | 0.5009 |
|                  | Male, day 2                                                | t=0.5277, df=8 | ns      | 0.6120 |
|                  | Female, day 3                                              | t=0.5298, df=9 | ns      | 0.6091 |
|                  | Male, day 3                                                | t=0.7421, df=7 | ns      | 0.4822 |
|                  | Female, day 4                                              | t=0.4336, df=9 | ns      | 0.6748 |
|                  | Male, day 4                                                | t=4.836, df=7  | **      | 0.0019 |
| Opposite (O-AUC) | Comparison                                                 | t, df          | Summary | P      |
|                  | Female, day 1                                              | t=0.6327, df=9 | ns      | 0.5427 |
|                  | Male, day 1                                                | t=2.133, df=9  | ns      | 0.0617 |
|                  | Female, day 2                                              | t=0.3549, df=9 | ns      | 0.7308 |
|                  | Male, day 2                                                | t=1.153, df=8  | ns      | 0.2821 |
|                  | Female, day 3                                              | t=0.3089, df=9 | ns      | 0.7644 |
|                  | Male, day 3                                                | t=1.405, df=7  | ns      | 0.2028 |
|                  | Female, day 4                                              | t=0.0202, df=9 | ns      | 0.9843 |
|                  | Male, day 4                                                | t=2.342, df=7  | ns      | 0.0517 |

**Table 23** – Statistical analysis of data shown in Figure 10C for serial reversal, cohort B, pass comparison. A *p*-value less than 0.05 is considered significant (\**p* < 0.05, \*\**p* < 0.01, \*\*\**p* < 0.001). ns = not significant.

356

## 357 Discussion

358 *App<sup>h/h</sup>* rats of both sexes were able to adapt to the IntelliCage and acquire simple place learning and  
 359 reversal tasks, as well as a more complex behavioral sequencing task, by 6-8 weeks of age. Males  
 360 tended to perform better than females at 4-5 months of age in place learning with corner switch and  
 361 behavioral sequencing. The results of the single corner restriction program for cohort B suggest that  
 362 although individual variance exists among the rats, it is small enough that animals can be

363 approximated as identical subjects for these IntelliCage experiments. Generating activity curves with  
364 aggregate cohort data is one way to reduce the impact of this variance on interpretation of cohort  
365 performance. Using AUC as a metric for comparing activity between groups is a natural extension of  
366 using linear fits on activity curves to estimate learning rate and takes full advantage of the data  
367 volume the IntelliCage offers. Task acquisition can be characterized by performance parameters—in  
368 this case, AUC—that are greater or less than the value that would be expected through chance alone,  
369 depending on the visit category. Chance C-AUC/O-AUC would be equal to the area of a right triangle  
370 with base of length 180 (number of minutes in a drinking session) and height of 0.25 (probability of  
371 visiting a correct/opposite corner at random), or 22.5. Similar calculations can be done for IC-AUC  
372 ( $180 \times 0.75 = 67.5$ ) and L-AUC ( $180 \times 0.50 = 90$ ). Significant session-wise differences in the  
373 appropriate direction can reflect task acquisition too, as seen with increases in C-AUC accompanied  
374 by decreases in IC-AUC, L-AUC, or O-AUC. These characteristics were observed for all the spatial  
375 learning programs except serial reversal, suggesting that the program is too complex for the rats to  
376 learn by 4-5 months of age. In general, a task that challenges the animals without being impossible to  
377 acquire would be ideal for identifying possible cognitive deficits in models of neurodegeneration and  
378 dementia. Task acquisition of behavioral sequencing but not serial reversal suggests that a program  
379 of intermediate difficulty using a sequence involving all four corners (in clockwise motion, for example)  
380 rather than just two in a single diagonal, might be worth testing in future studies. By these measures,  
381 this study establishes a baseline spatial learning profile for *App<sup>h/h</sup>* control rats while providing initial  
382 validation of analytic methods exploring aggregate cohort activity and using AUC as a metric for task  
383 performance in the IntelliCage.

## 384 References

- 385 1. Vann KT, Xiong ZG. Optogenetics for neurodegenerative diseases. *Int J Physiol Pathophysiol*  
386 *Pharmacol.* 2016;8(1):1-8.
- 387 2. Julius AS, Se Joon C, Ana M, Yosif G, Karl D, David S, et al. Optogenetics enables functional  
388 analysis of human embryonic stem cell–derived grafts in a Parkinson's disease model. *Nature*  
389 *Biotechnology.* 2015;33(2):204.
- 390 3. Campbell MG, Veesler D, Cheng A, Potter CS, Carragher B. 2.8 Å resolution reconstruction of  
391 the *Thermoplasma acidophilum* 20S proteasome using cryo-electron microscopy. *Elife.*  
392 2015;4:e06380.
- 393 4. Falcon B, Zhang W, Murzin AG, Murshudov G, Garringer HJ, Vidal R, et al. Structures of  
394 filaments from Pick's disease reveal a novel tau protein fold. *Nature.* 2018;561(7721):137-40.
- 395 5. Zeisel A, Hochgerner H, Lonnerberg P, Johnsson A, Memic F, van der Zwan J, et al.  
396 Molecular Architecture of the Mouse Nervous System. *Cell.* 2018;174(4):999-1014 e22.
- 397 6. Komor AC, Badran AH, Liu DR. CRISPR-Based Technologies for the Manipulation of  
398 Eukaryotic Genomes. *Cell.* 2017;168(1-2):20-36.
- 399 7. Tanila H. Testing cognitive functions in rodent disease models: Present pitfalls and future  
400 perspectives. *Behav Brain Res.* 2018;352:23-7.
- 401 8. Bussey TJ, Padain TL, Skillings EA, Winters BD, Morton AJ, Saksida LM. The touchscreen  
402 cognitive testing method for rodents: how to get the best out of your rat. *Learn Mem.* 2008;15(7):516-  
403 23.
- 404 9. Endo T, Maekawa F, Voikar V, Haijima A, Uemura Y, Zhang Y, et al. Automated test of  
405 behavioral flexibility in mice using a behavioral sequencing task in IntelliCage. *Behav Brain Res.*  
406 2011;221(1):172-81.
- 407 10. Wu N, Wang F, Jin Z, Zhang Z, Wang LK, Zhang C, et al. Effects of GABAB receptors in the  
408 insula on recognition memory observed with intellicage. *Behav Brain Funct.* 2017;13(1):7.
- 409 11. Masuda A, Kobayashi Y, Kogo N, Saito T, Saido TC, Itohara S. Cognitive deficits in single App  
410 knock-in mouse models. *Neurobiol Learn Mem.* 2016;135:73-82.
- 411 12. Panza F, Lozupone M, Seripa D, Imbimbo BP. Amyloid-beta immunotherapy for alzheimer  
412 disease: Is it now a long shot? *Ann Neurol.* 2019;85(3):303-15.
- 413 13. Ricciarelli R, Fedele E. The Amyloid Cascade Hypothesis in Alzheimer's Disease: It's Time to  
414 Change Our Mind. *Curr Neuropsychopharmacol.* 2017;15(6):926-35.
- 415 14. Hardy JA, Higgins GA. Alzheimer's disease: the amyloid cascade hypothesis. *Science.*  
416 1992;256(5054):184-5.
- 417 15. Lanoiselée HM, Nicolas G, Wallon D, Rovelet-Lecrux A, Lacour M, Rousseau S, et al. APP,  
418 PSEN1, and PSEN2 mutations in early-onset Alzheimer disease: A genetic screening study of familial  
419 and sporadic cases. *PLoS Med.* 2017;14(3):e1002270.
- 420 16. Drummond E, Wisniewski T. Alzheimer's disease: experimental models and reality. *Acta*  
421 *Neuropathol.* 2017;133(2):155-75.
- 422 17. Villemagne VL, Pike KE, Chetelat G, Ellis KA, Mulligan RS, Bourgeat P, et al. Longitudinal  
423 assessment of Aβeta and cognition in aging and Alzheimer disease. *Ann Neurol.* 2011;69(1):181-92.
- 424 18. Klunk WE, Mathis CA, Price JC, DeKosky ST, Lopresti BJ, Tsopelas ND, et al. Amyloid  
425 Imaging with PET in Alzheimer's Disease, Mild Cognitive Impairment, and Clinically Unimpaired  
426 Subjects. In: Silverman D, editor. *PET in the Evaluation of Alzheimer's Disease and Related*  
427 *Disorders.* New York, NY: Springer New York; 2009. p. 119-47.
- 428 19. Aizenstein HJ, Nebes RD, Saxton JA, Price JC, Mathis CA, Tsopelas ND, et al. Frequent  
429 amyloid deposition without significant cognitive impairment among the elderly. *Arch Neurol.*  
430 2008;65(11):1509-17.
- 431 20. Dickson DW, Crystal HA, Mattiace LA, Masur DM, Blau AD, Davies P, et al. Identification of  
432 normal and pathological aging in prospectively studied nondemented elderly humans. *Neurobiology of*  
433 *aging.* 1992;13(1):179-89.

21. Delaère P, Duyckaerts C, Masters C, Beyreuther K, Piette F, Hauw JJ. Large amounts of neocortical  $\beta$ A4 deposits without neuritic plaques nor tangles in a psychometrically assessed, non-demented person. *Neuroscience Letters*. 1990;116(1-2):87-93.
22. Katzman R, Terry R, DeTeresa R, Brown T, Davies P, Fuld P, et al. Clinical, pathological, and neurochemical changes in dementia: a subgroup with preserved mental status and numerous neocortical plaques. *Ann Neurol*. 1988;23(2):138-44.
23. Bartelle BB, Barandov A, Jasanoff A. Molecular fMRI. *J Neurosci*. 2016;36(15):4139-48.
24. Leuzy A, Zimmer ER, Heurling K, Rosa-Neto P, Gauthier S. Use of amyloid PET across the spectrum of Alzheimer's disease: clinical utility and associated ethical issues. *Amyloid*. 2014;21(3):143-8.
25. Zimmer ER, Leuzy A, Bhat V, Gauthier S, Rosa-Neto P. In vivo tracking of tau pathology using positron emission tomography (PET) molecular imaging in small animals. *Transl Neurodegener*. 2014;3(1):6.
26. Zimmer ER, Leuzy A, Gauthier S, Rosa-Neto P. Developments in Tau PET Imaging. *Can J Neurol Sci*. 2014;41(5):547-53.
27. Hanes J, Zilka N, Bartkova M, Caletkova M, Dobrota D, Novak M. Rat tau proteome consists of six tau isoforms: implication for animal models of human tauopathies. *J Neurochem*. 2009;108(5):1167-76.
28. Andreadis A. Tau gene alternative splicing: expression patterns, regulation and modulation of function in normal brain and neurodegenerative diseases. *Biochim Biophys Acta*. 2005;1739(2-3):91-103.
29. Hong M, Zhukareva V, Vogelsberg-Ragaglia V, Wszolek Z, Reed L, Miller BI, et al. Mutation-Specific Functional Impairments in Distinct Tau Isoforms of Hereditary FTDP-17. *Science*. 1998;282(5395):1914-7.
30. Janke C, Beck M, Stahl T, Holzer M, Brauer K, Bigl V, et al. Phylogenetic diversity of the expression of the microtubule-associated protein tau: implications for neurodegenerative disorders. *Molecular Brain Research*. 1999;68(1-2):119-28.
31. Roberson ED, Searce-Levie K, Palop JJ, Yan F, Cheng IH, Wu T, et al. Reducing endogenous tau ameliorates amyloid beta-induced deficits in an Alzheimer's disease mouse model. *Science*. 2007;316(5825):750-4.
32. Goedert M, Crowther RA, Spillantini MG. Tau mutations cause frontotemporal dementias. *Neuron*. 1998;21(5):955-8.
33. Grover A, England E, Baker M, Sahara N, Adamson J, Granger B, et al. A novel tau mutation in exon 9 (1260V) causes a four-repeat tauopathy. *Exp Neurol*. 2003;184(1):131-40.
34. Grundke-Iqbal I, Iqbal K, Tung YC, Quinlan M, Wisniewski HM, Binder LI. Abnormal phosphorylation of the microtubule-associated protein tau (tau) in Alzheimer cytoskeletal pathology. *Proc Natl Acad Sci U S A*. 1986;83(13):4913-7.
35. Hutton M, Lendon CL, Rizzu P, Baker M, Froelich S, Houlden H, et al. Association of missense and 5'-splice-site mutations in tau with the inherited dementia FTDP-17. *Nature*. 1998;393(6686):702-5.
36. Kowalska A, Hasegawa M, Miyamoto K, Akiguchi I, Ikemoto A, Takahashi K, et al. A novel mutation at position +11 in the intron following exon 10 of the tau gene in FTDP-17. *J Appl Genet*. 2002;43(4):535-43.
37. Spillantini MG, Goedert M. Tau protein pathology in neurodegenerative diseases. *Trends Neurosci*. 1998;21(10):428-33.
38. Stanford PM, Shepherd CE, Halliday GM, Brooks WS, Schofield PW, Brodaty H, et al. Mutations in the tau gene that cause an increase in three repeat tau and frontotemporal dementia. *Brain*. 2003;126(Pt 4):814-26.
39. Yasuda M, Takamatsu J, D'Souza I, Crowther RA, Kawamata T, Hasegawa M, et al. A novel mutation at position +12 in the intron following Exon 10 of the tau gene in familial frontotemporal dementia (FTD-Kumamoto). *Annals of Neurology*. 2000;47(4):422-9.
40. McMillan P, Korvatska E, Poorkaj P, Evstafjeva Z, Robinson L, Greenup L, et al. Tau isoform regulation is region- and cell-specific in mouse brain. *J Comp Neurol*. 2008;511(6):788-803.

41. Deacon RM. Housing, husbandry and handling of rodents for behavioral experiments. *Nat Protoc.* 2006;1(2):936-46.
42. Foote AL, Crystal JD. Metacognition in the rat. *Curr Biol.* 2007;17(6):551-5.
43. Kepecs A, Uchida N, Zariwala HA, Mainen ZF. Neural correlates, computation and behavioural impact of decision confidence. *Nature.* 2008;455(7210):227-31.
44. Whishaw IQ, Metz GA, Kolb B, Pellis SM. Accelerated nervous system development contributes to behavioral efficiency in the laboratory mouse: a behavioral review and theoretical proposal. *Dev Psychobiol.* 2001;39(3):151-70.
45. Ueno H, Yamaguchi T, Fukunaga S, Okada Y, Yano Y, Hoshino M, et al. Comparison between the aggregation of human and rodent amyloid beta-proteins in GM1 ganglioside clusters. *Biochemistry.* 2014;53(48):7523-30.
46. Mullan M, Crawford F, Axelman K, Houlden H, Lilius L, Winblad B, et al. A pathogenic mutation for probable Alzheimer's disease in the APP gene at the N-terminus of beta-amyloid. *Nat Genet.* 1992;1(5):345-7.
47. Jonsson T, Atwal JK, Steinberg S, Snaedal J, Jonsson PV, Bjornsson S, et al. A mutation in APP protects against Alzheimer's disease and age-related cognitive decline. *Nature.* 2012;488(7409):96-9.
48. Tambini MD, Yao W, D'Adamio L. Facilitation of glutamate, but not GABA, release in Familial Alzheimer's APP mutant Knock-in rats with increased  $\beta$ -cleavage of APP. *Aging Cell.* 2019;18(6):e13033.
49. Tambini MD, Norris KA, D'Adamio L. Opposite changes in APP processing and human A $\beta$  levels in rats carrying either a protective or a pathogenic APP mutation. *eLife.* 2020;9:e52612.
50. Tambini MD, D'Adamio L. Knock-in rats with homozygous *PSEN1*<sup>L435F</sup> Alzheimer mutation are viable and show selective  $\gamma$ -secretase activity loss causing low A $\beta$ <sub>40/42</sub> and high A $\beta$ <sub>43</sub>. *J Biol Chem.* 2020;295(21):7442-51.
51. Yin T, Yao W, Norris KA, D'Adamio L. A familial Danish dementia rat shows impaired presynaptic and postsynaptic glutamatergic transmission. *J Biol Chem.* 2021;297(3):101089.
52. Tambini MD, D'Adamio L. Trem2 Splicing and Expression are Preserved in a Human Abeta-producing, Rat Knock-in Model of Trem2-R47H Alzheimer's Risk Variant. *Sci Rep.* 2020;10(1):4122.
53. Ren S, Yao W, Tambini MD, Yin T, Norris KA, D'Adamio L. Microglia *TREM2*<sup>R47H</sup> Alzheimer-linked variant enhances excitatory transmission and reduces LTP via increased TNF- $\alpha$  levels. *Elife.* 2020;9.
54. Ren S, Breuillaud L, Yao W, Yin T, Norris KA, Zehntner SP, et al. TNF- $\alpha$ -mediated reduction in inhibitory neurotransmission precedes sporadic Alzheimer's disease pathology in young Trem2 R<sup>47H</sup> rats. *J Biol Chem.* 2020;296:100089.
55. Guerreiro R, Wojtas A, Bras J, Carrasquillo M, Rogaeva E, Majounie E, et al. TREM2 variants in Alzheimer's disease. *N Engl J Med.* 2013;368(2):117-27.
56. Jonsson T, Stefansson H, Steinberg S, Jonsdottir I, Jonsson PV, Snaedal J, et al. Variant of TREM2 associated with the risk of Alzheimer's disease. *N Engl J Med.* 2013;368(2):107-16.

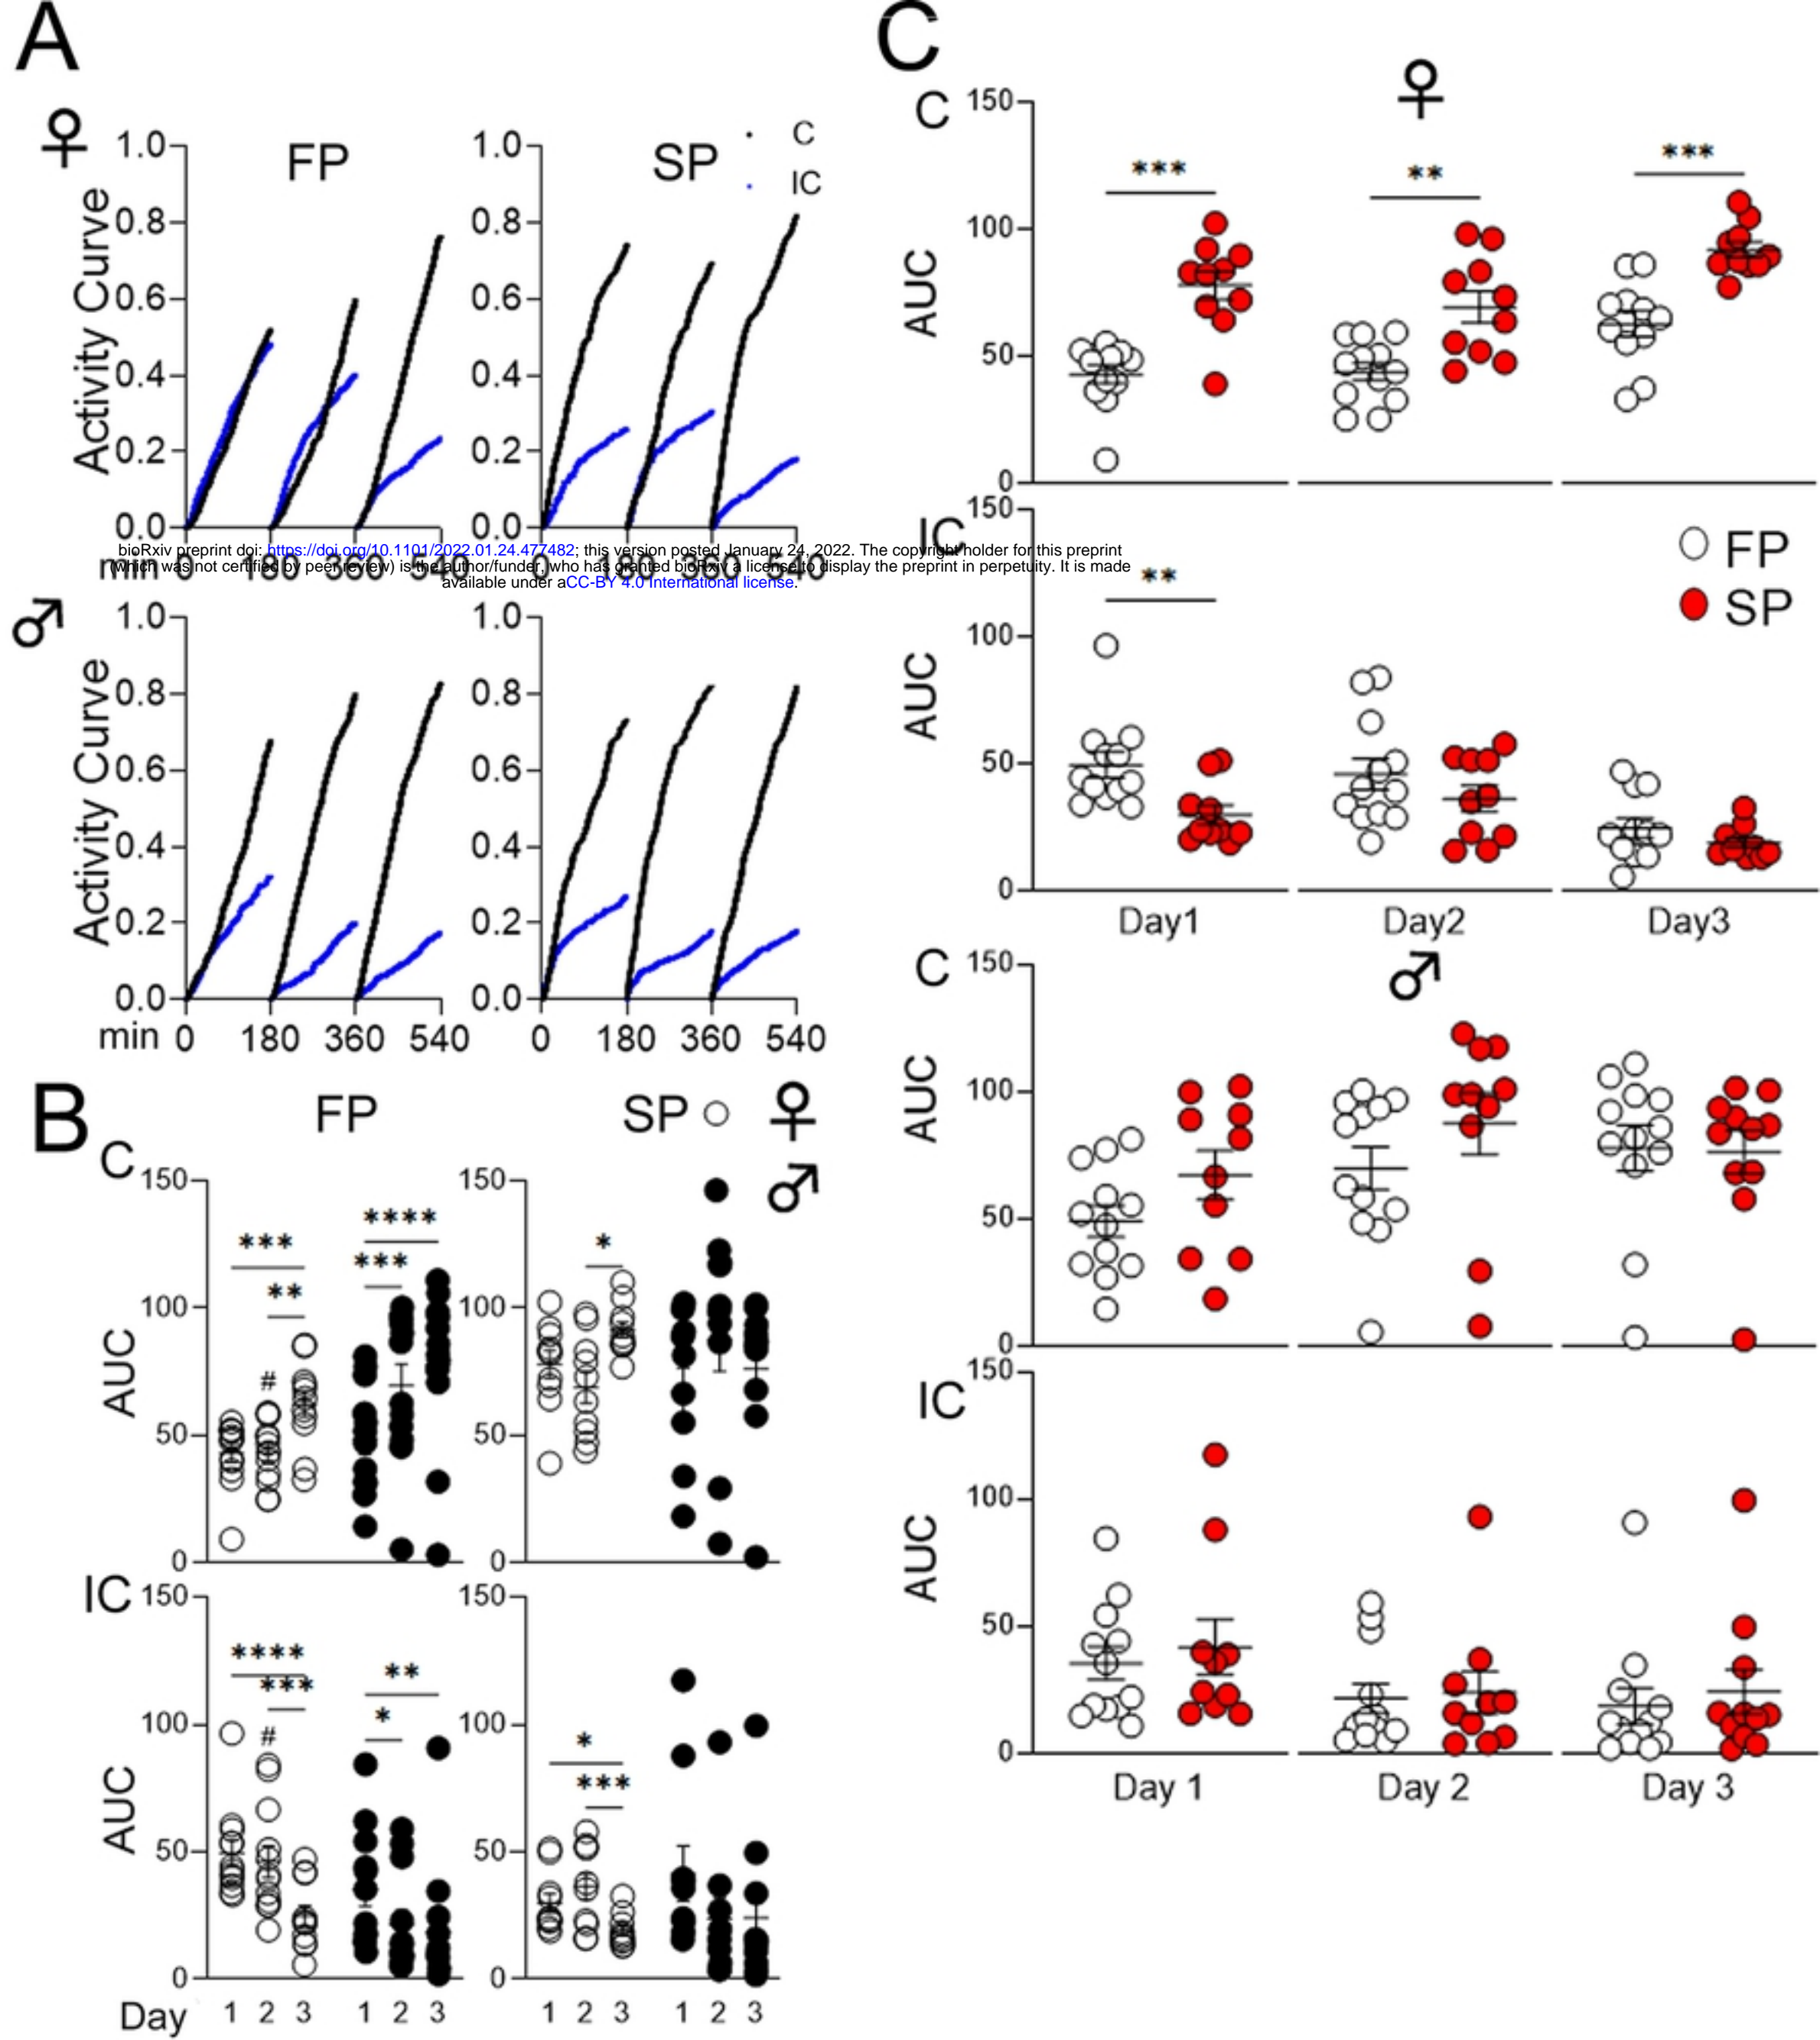

Figure 4



A

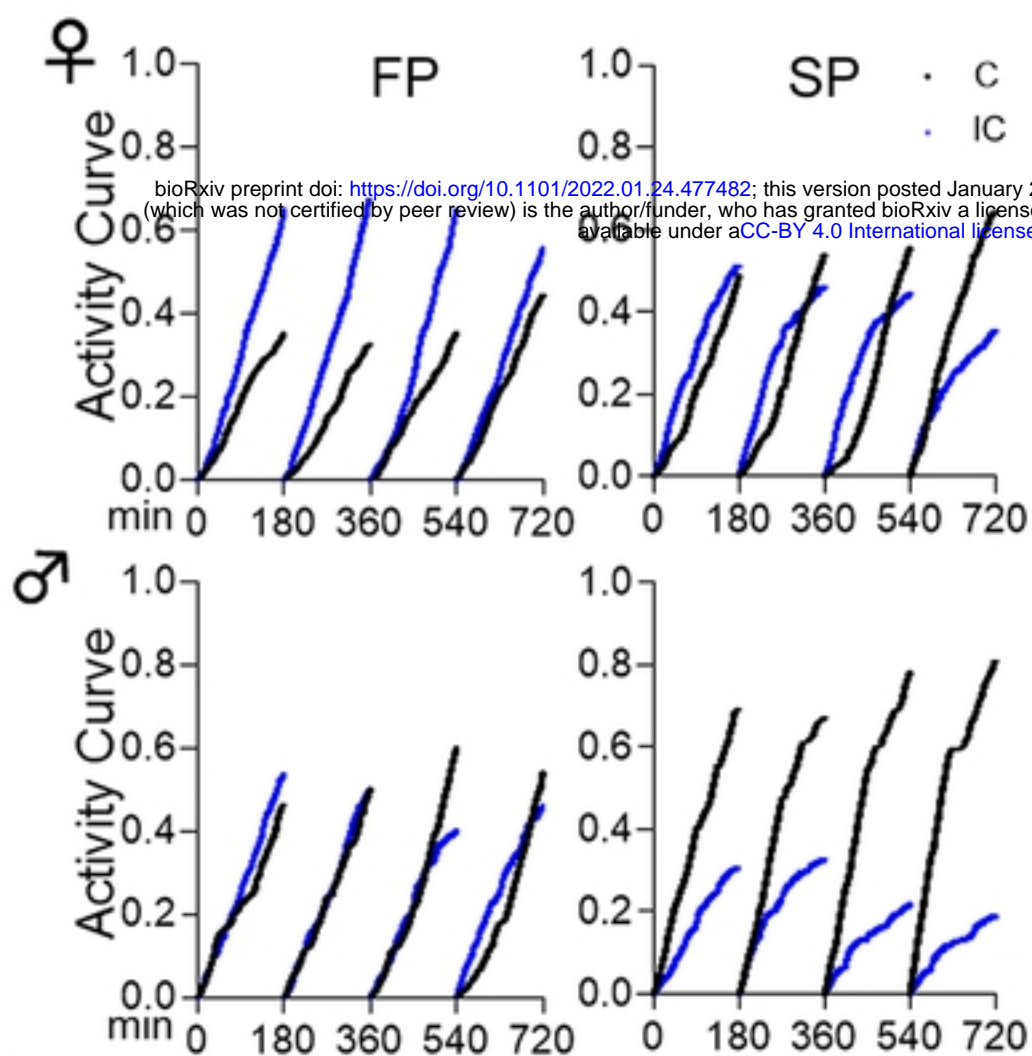

B

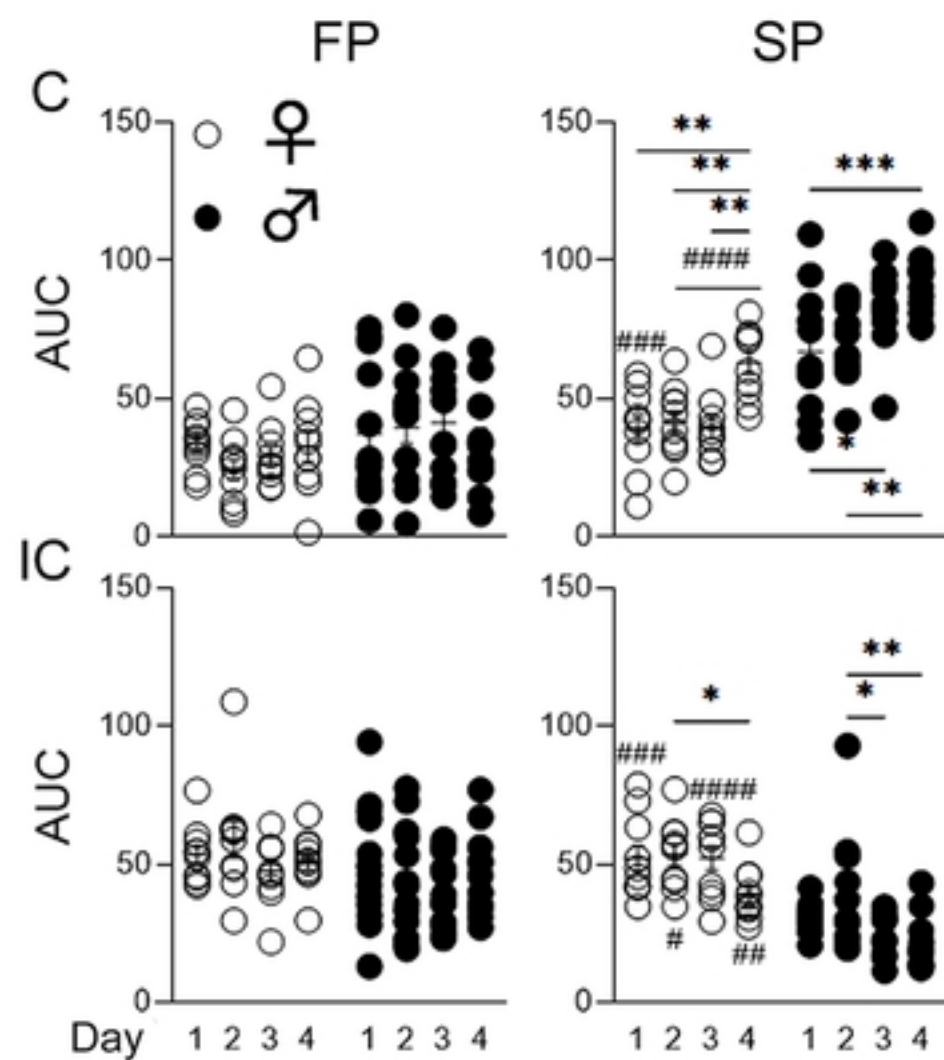

C

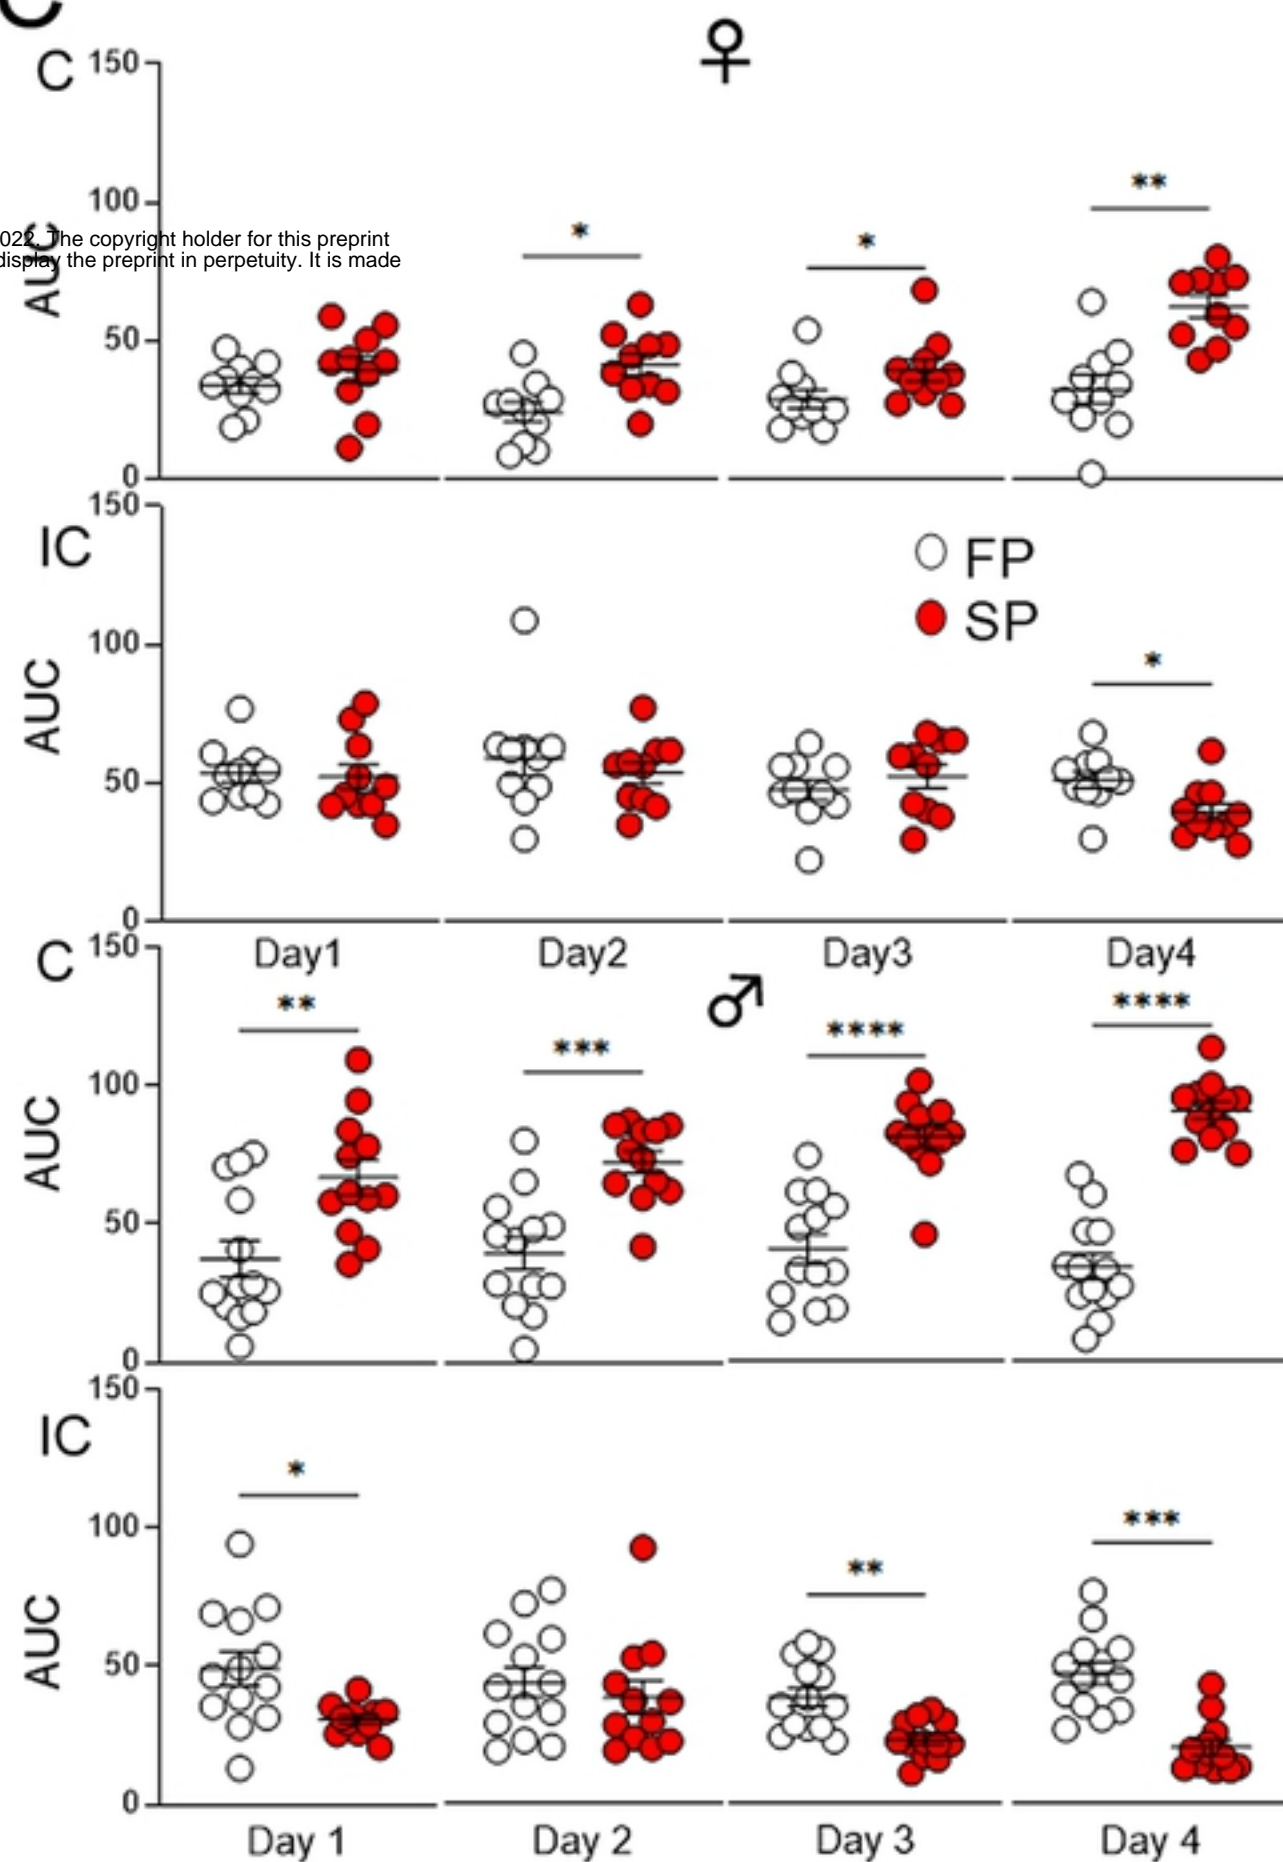

Figure 6

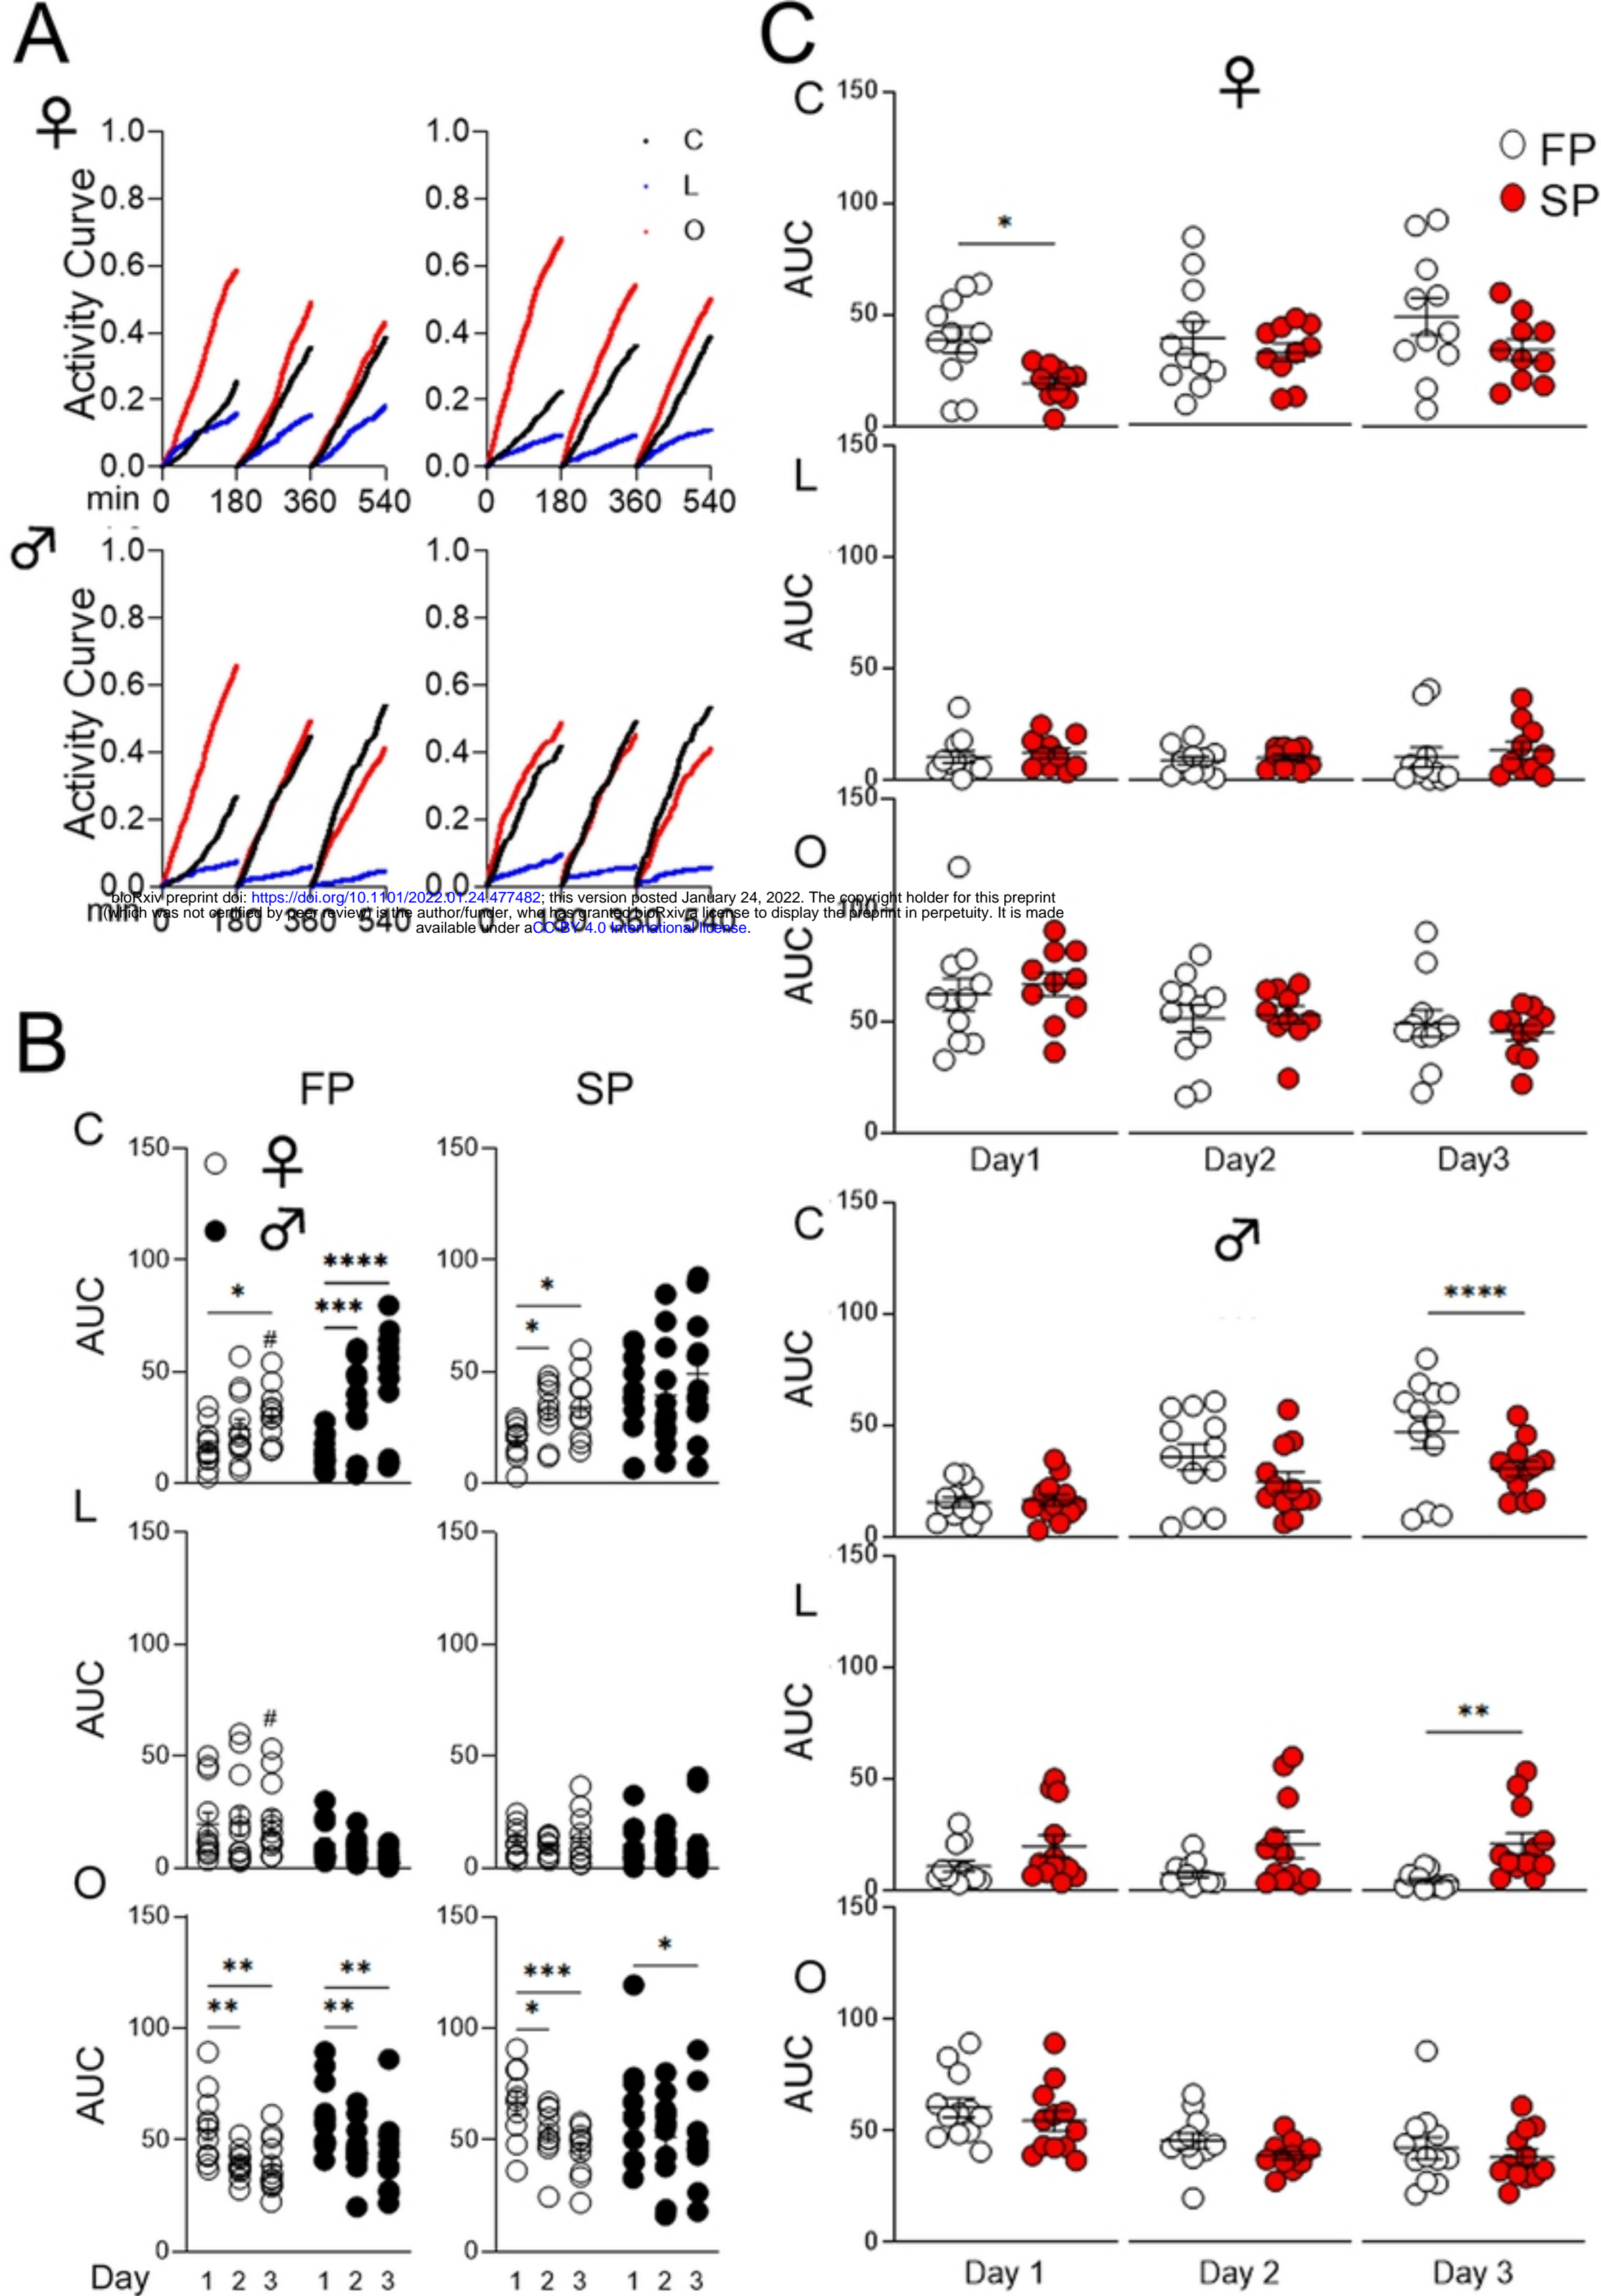

Figure 7

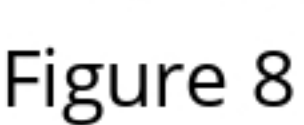

Figure 8

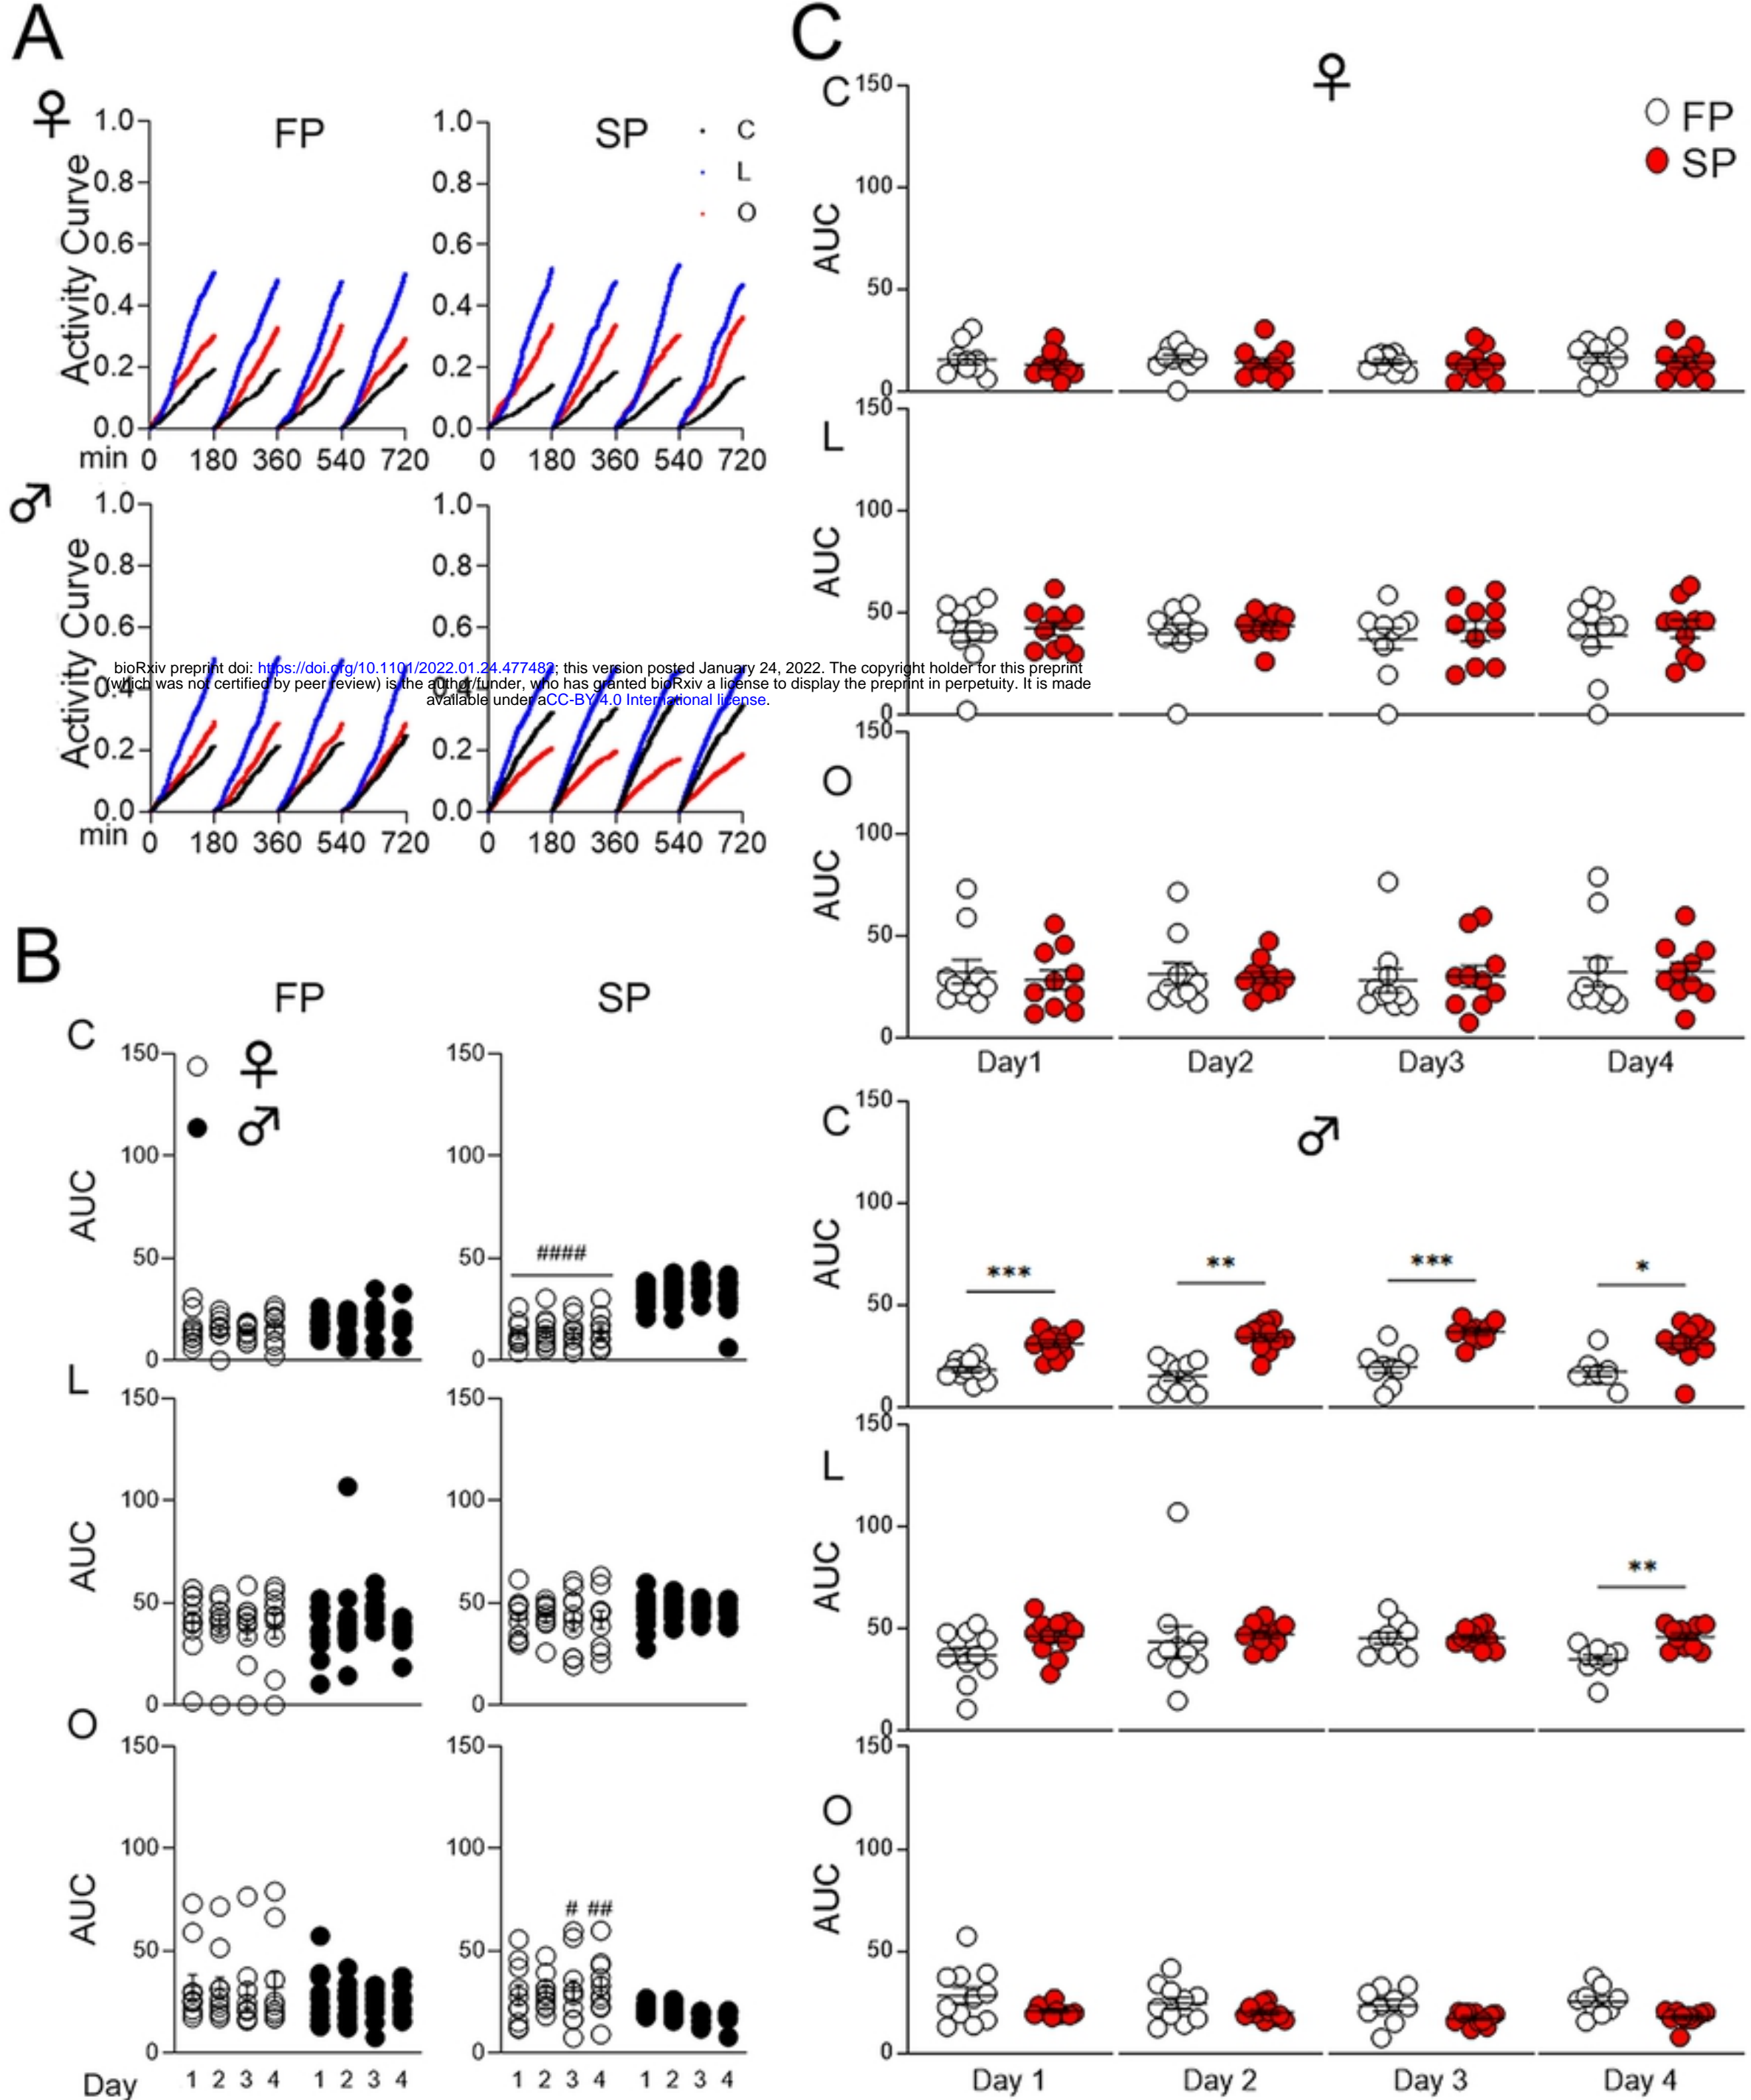

Figure 10

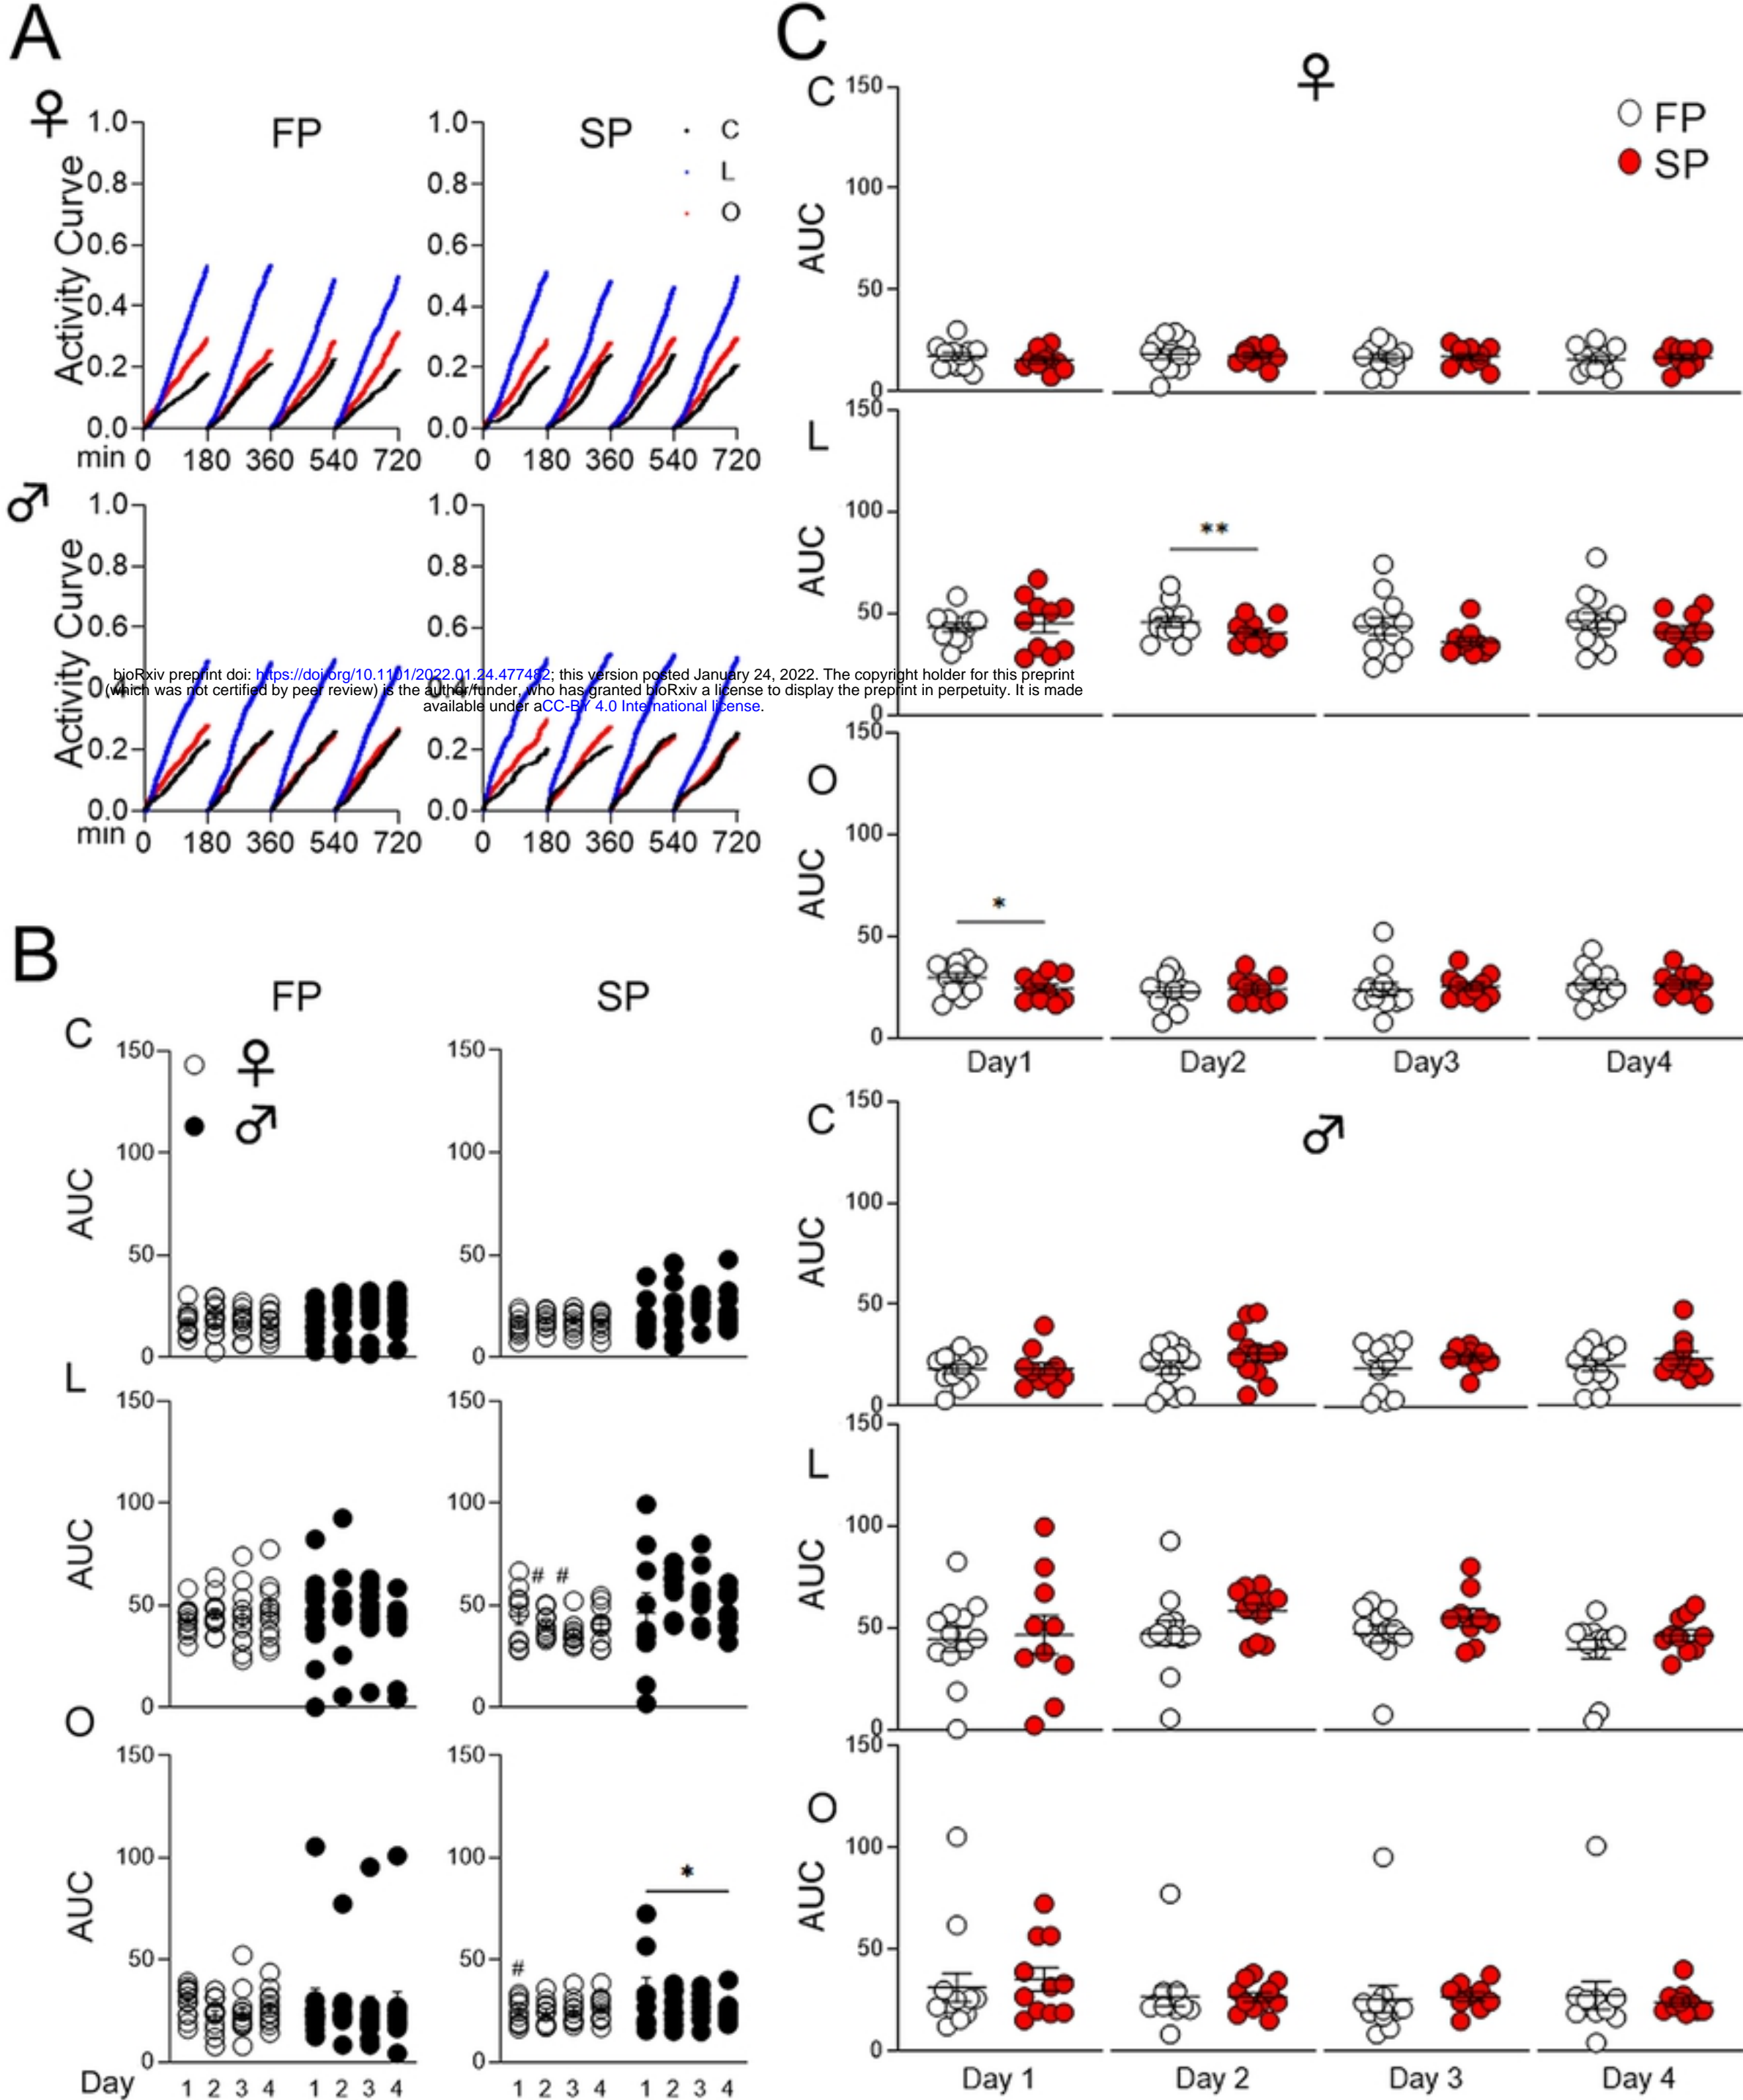

Figure 9

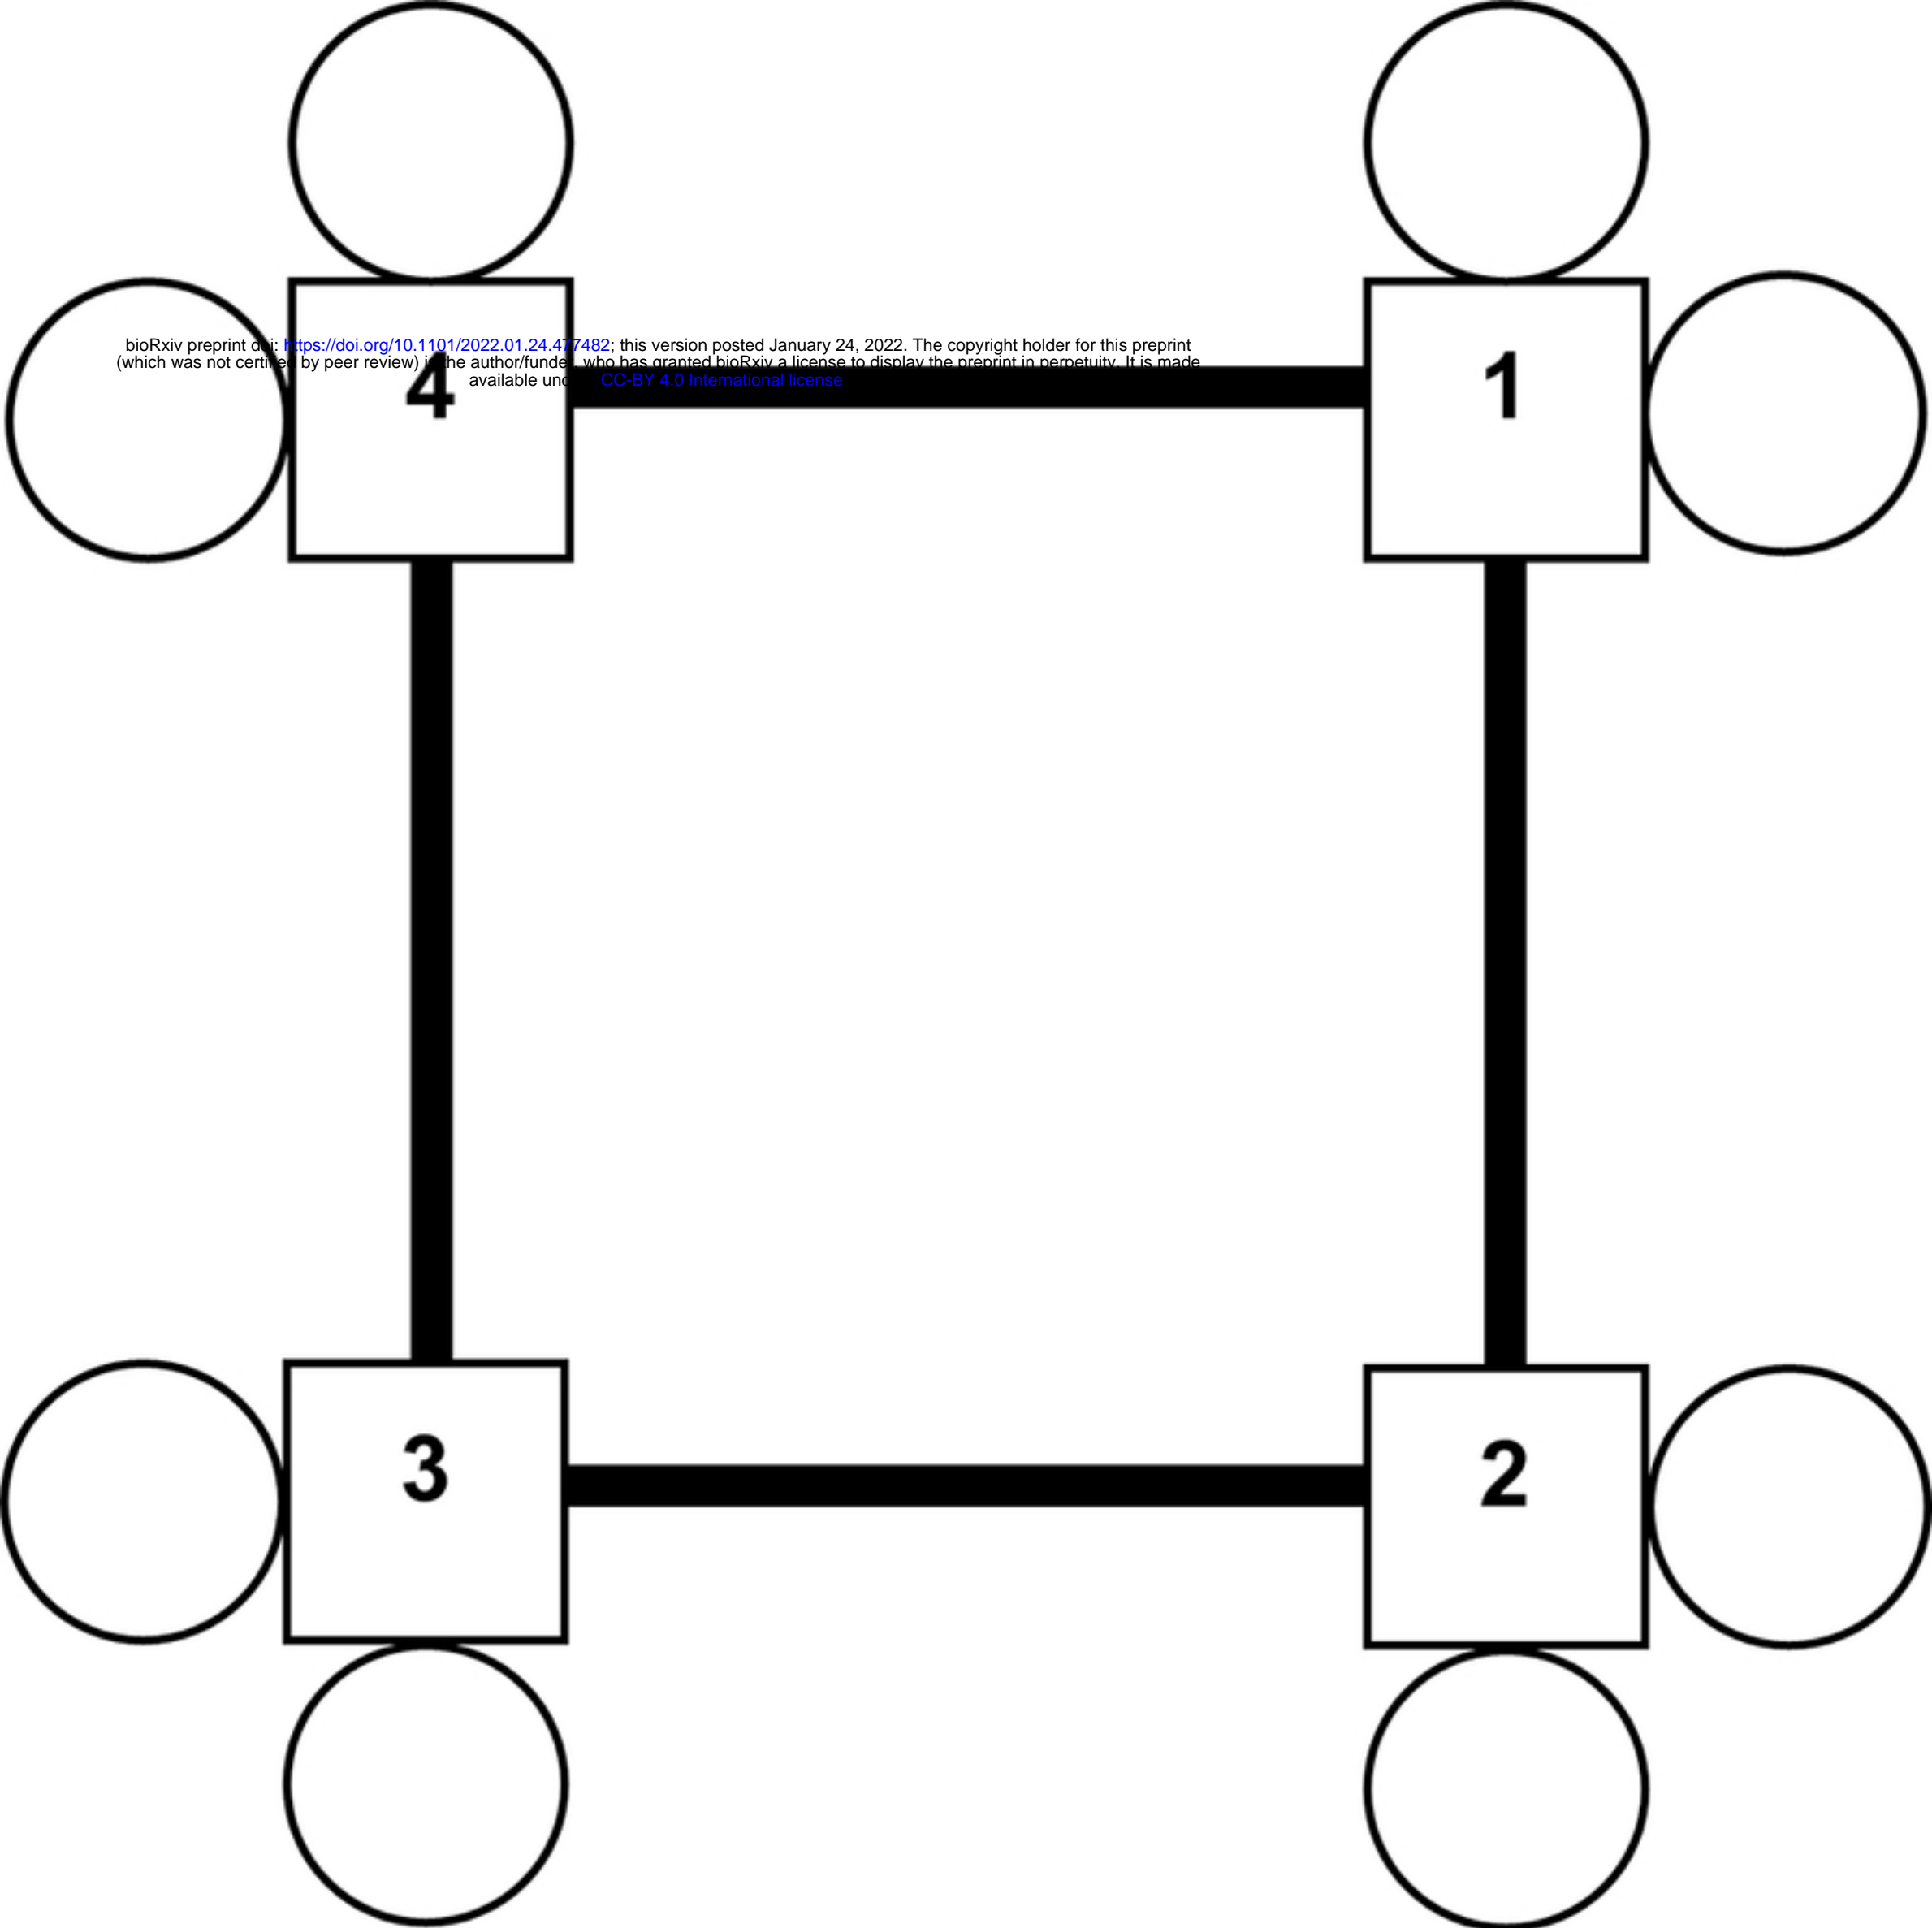

Figure 1

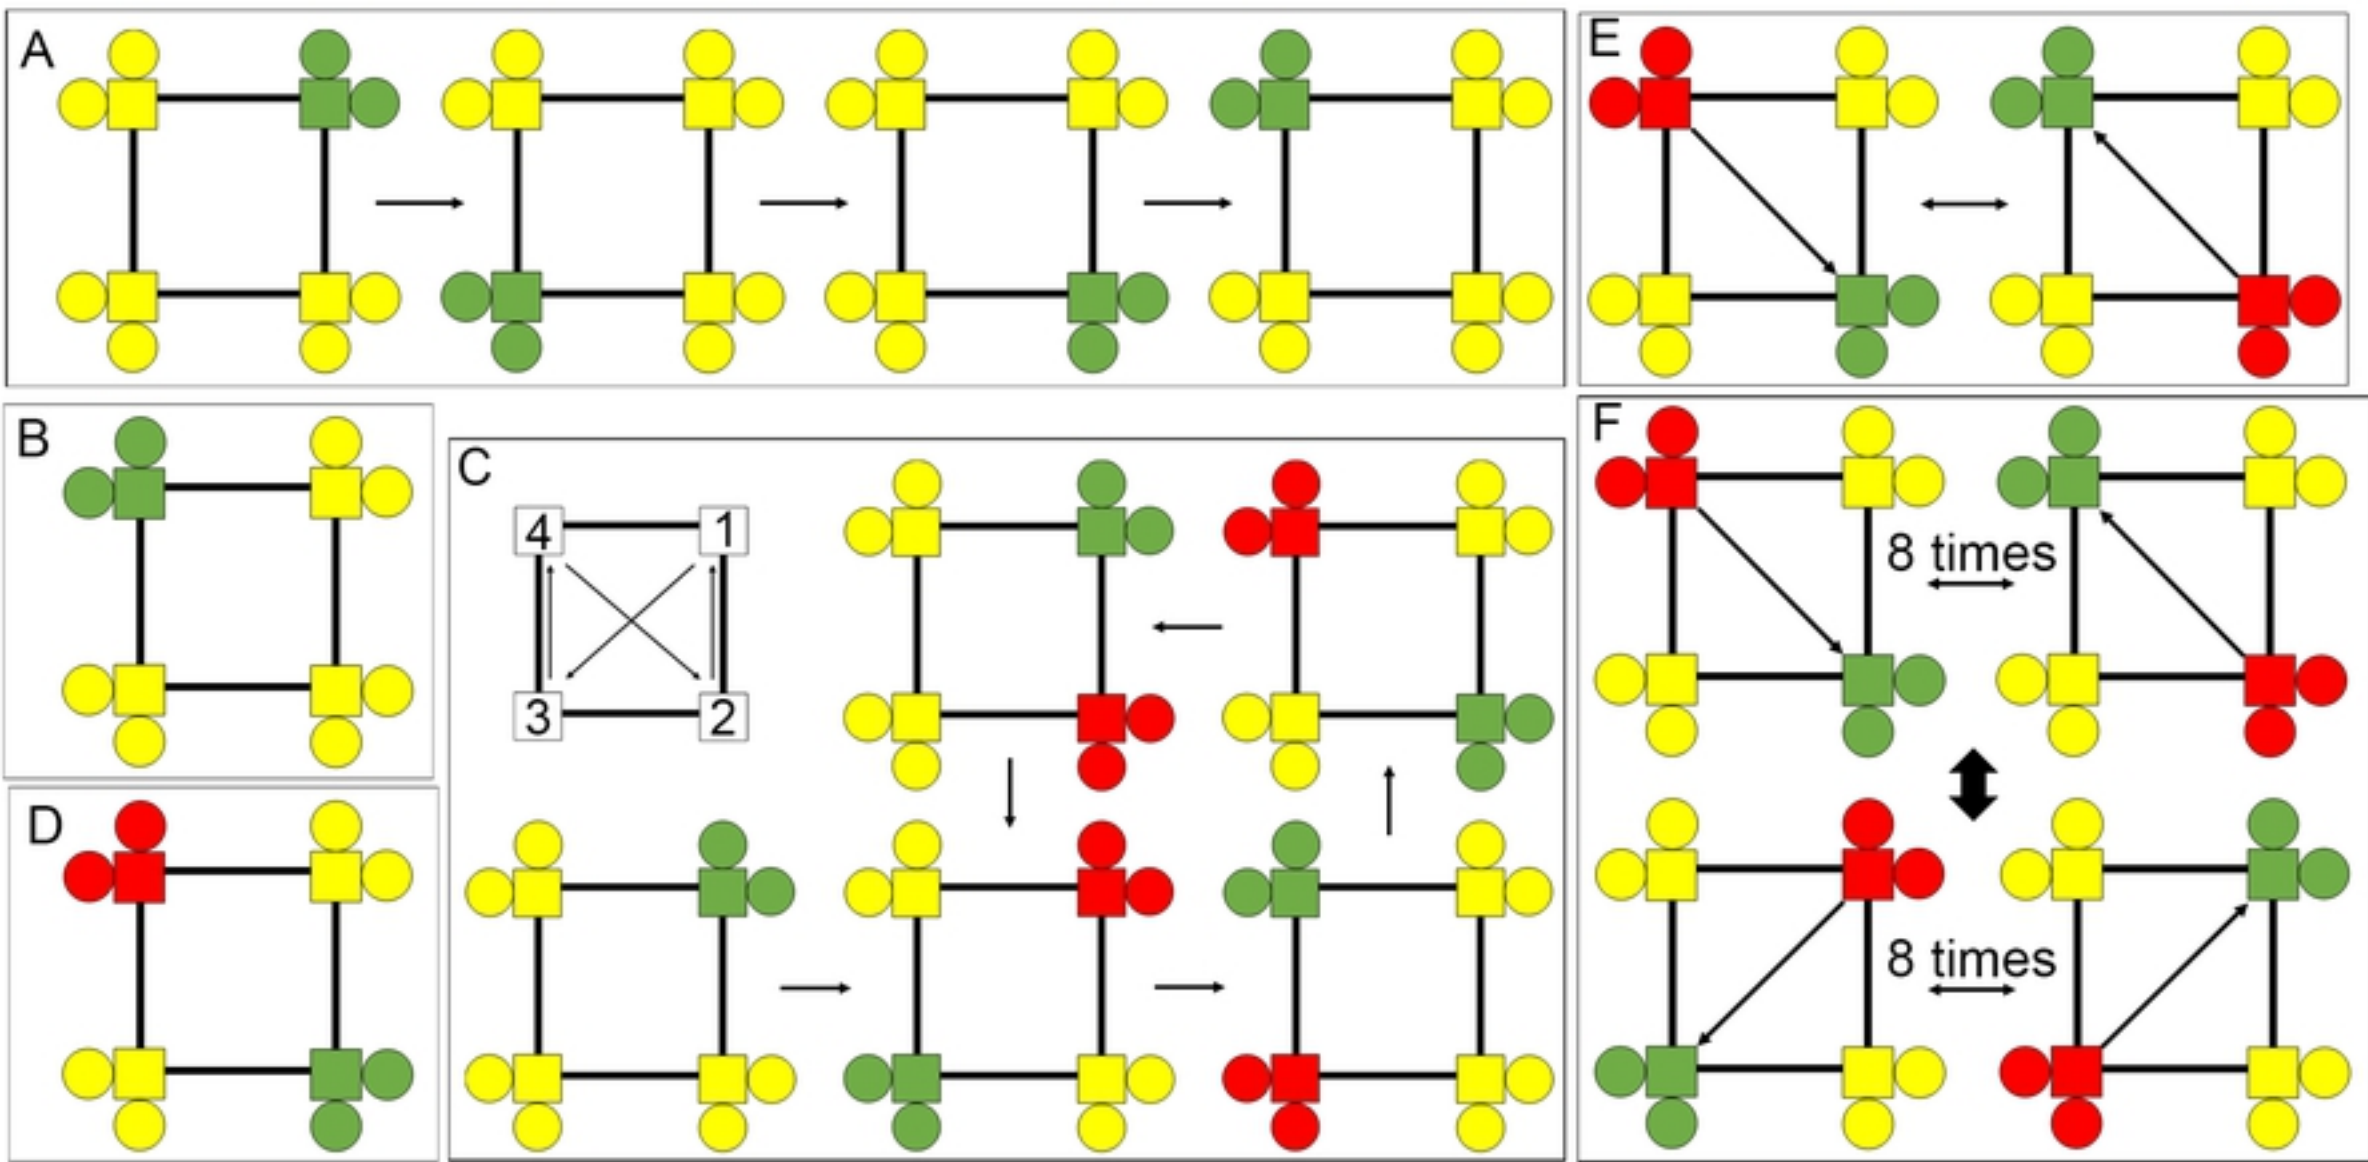

Figure 2

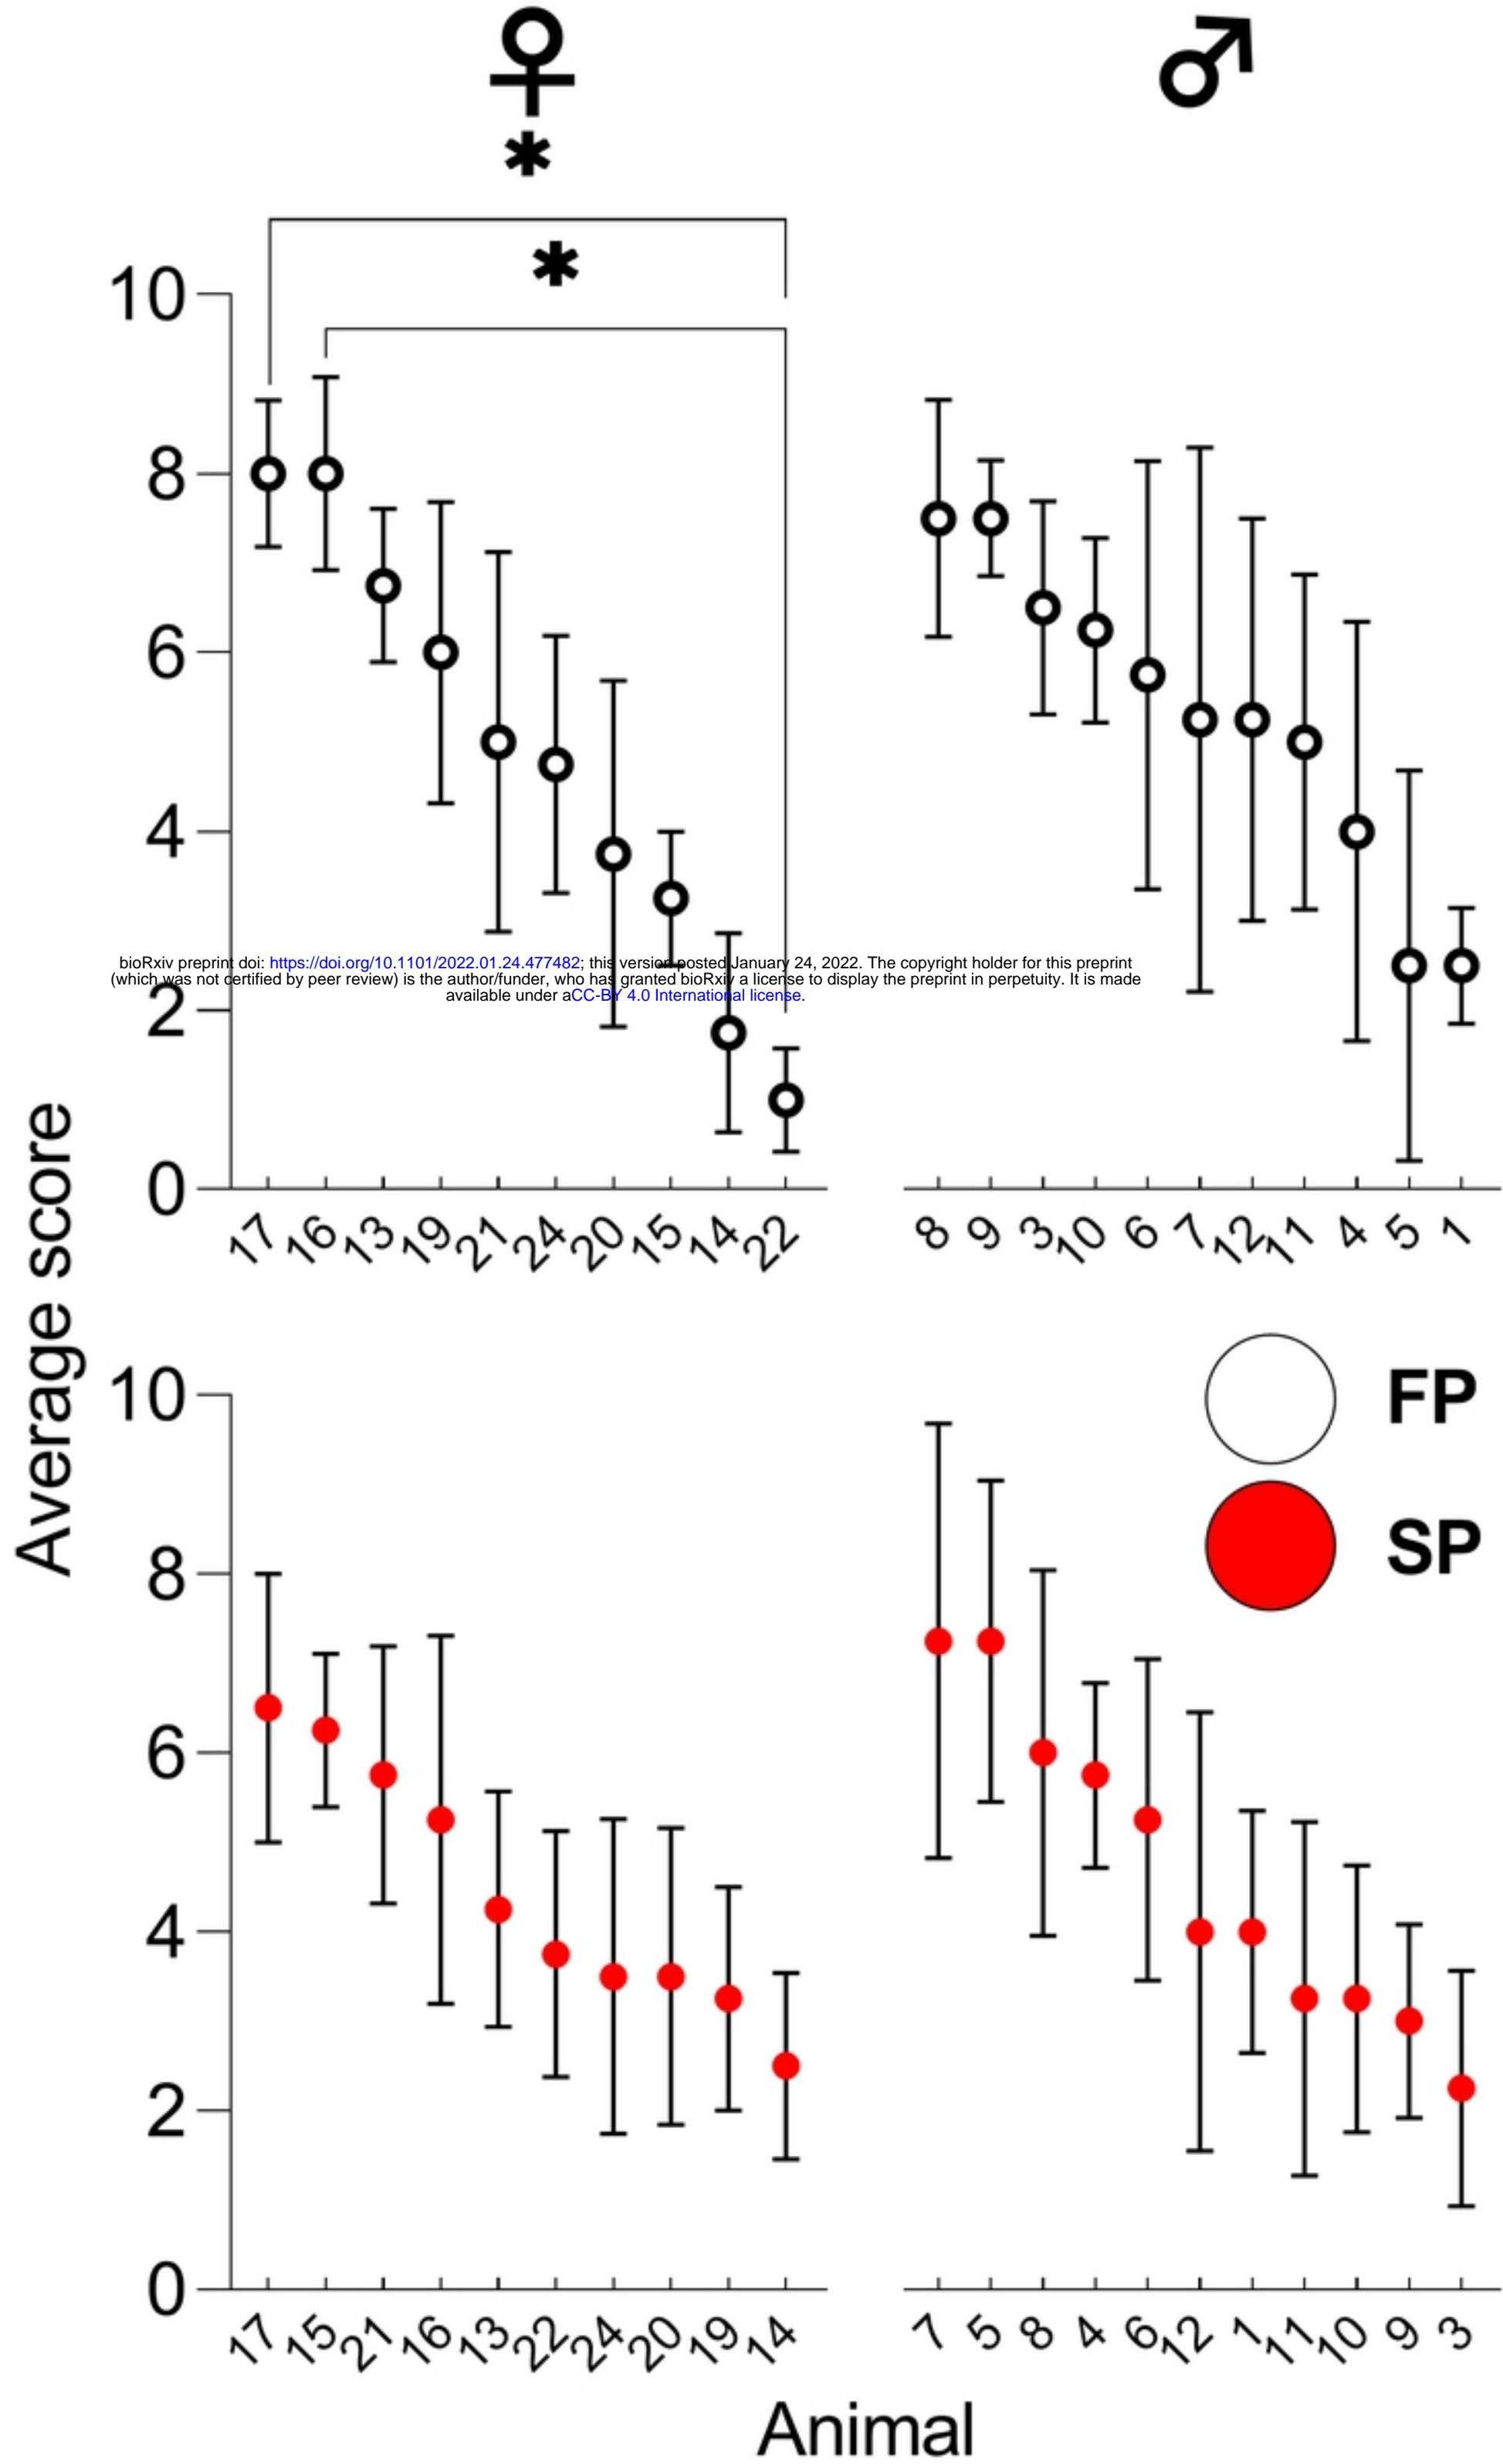

Figure 3
